# Supplementary material
Source: publisher site journal article supplement (https://www.spandidos-publications.com/1266/downloadSupplementary)
Supplement: Supplementary file 1 [file downloadSupplementary]

## Sheet: TABLE SII
Table SII. Non‑quantitative B7‑H4 SPPLAT experiment followed by affinity purification (AP)‑MS resulted in the identification of 410 specific of a total of 2,004 biotinylated proteins, including controls. n=2 replicates. MS, mass spectrometry. SPPLAT, specific proteomic proximity labelling assay using tyramide.
UNIPROT	Official gene symbol	DESC	B7H1	B7H4	N	GO_SLIM_CC	GO_SLIM_BP	GO_SLIM_MF	MASCOT_SCORE B7H1 avg	MASCOT_SCORE B7H4 avg	EMPAI B7H1 avg	EMPAI B7H4 avg	Fold enrichment	EMPAI_CALC B7H1 avg	EMPAI_CALC B7H4 avg	UNIQPEPS B7H1	UNIQPEPS B7H4	UNIQPEPSEQS B7H1	UNIQPEPSEQS B7H4	COVERAGE B7H1	COVERAGE B7H4	PEPTIDES B7H1	PEPTIDES B7H4	PEPTIDES control
H0YEU2		40S ribosomal protein S3		1	1	cytosol,endoplasmic reticulum,ribosome	metabolic process	RNA binding,structural molecule activity		512		5.16			5.8129	0	11	0	11	0	67.8		DEILPTTPISEQK,FIMESGAK,AELNEFLTR,GFVADGIFK,ELAEDGYSGVEVR,KPLPDHVSIVEPK,IMLPWDPTGK,GGKPEPPAMPQPVPTA,ACYGVLR,GCEVVVSGK,TEIIILATR
Q53GE9	EEF1A1	elongation factor 1-alpha		1	1	cytoplasm,cytoskeleton,cytosol,extracellular,membrane,nucleus,organelle lumen	metabolic process,regulation of biological process,response to stimulus,transport	RNA binding,catalytic activity,nucleotide binding,protein binding		984		3.03			5.6608	0	20	0	19	0	50.8		SVEMHHEALSEALPGDNVGFNVK,QTVAVGVIK,YYVTIIDAPGHR,FEKEAAEMGK,EHALLAYTLGVK,MDSTEPPYSQK,EVSAYIK,TIEKFEK,YEEIVK,STTTGHLIYK,VETGVLKPGMVVTFAPVNVTTEVK,DGNASGTTLLEALDCILPPTRPTDKPLR,QLIVGVNK,KLEDGPK,IGGIGTVPVGR,NMITGTSQADCAVLIVAAGVGEFEAGISK,LPLQDVYK,THINIVVIGHVDSGK,KDGNASGTTLLEALDCILPPTRPTDKPLR
A8K6Q8	TFRC	cDNA FLJ75881, highly similar to Homo sapiens transferrin receptor (p90, CD71) (TFRC), mRNA	1	1	2	cell surface,endosome,extracellular,membrane	cell differentiation,cell organization and biogenesis,cellular homeostasis,metabolic process,regulation of biological process,response to stimulus,transport	RNA binding,protein binding,receptor activity,transporter activity	1999	2470	3.04	6.11	2.00987	4.2593	4.8539	35	48	33	38	48.4	51.7	DSAQNSVIIVDKNGR,LLNENSYVPR,GFVEPDHYVVVGAQR,HPVTGQFLYQDSNWASK,LFGNMEGDCPSDWK,LVHANFGTK,YNSQLLSFVR,VEYHFLSPYVSPK,LAVDEEENADNNTK,SGVGTALLLK,LVYLVENPGGYVAYSK,LDSTDFTSTIK,AVLGTSNFK,LTVSNVLK,AFTYINLDK,ILNIFGVIK,VANAESLNAIGVLIYMDQTK,VSASPLLYTLIEK,DSAQNSVIIVDK,EEPGEDFPAAR,AAAEVAGQFVIK,SSGLPNIPVQTISR,DLNQYR,EMGLSLQWLYSAR,LAQMFSDMVLK,LYWDDLK,LTHDVELNLDYER,DGFQPSR,ADIKEMGLSLQWLYSAR,LTTDFGNAEK,SAFSNLFGGEPLSY…	DSAQNSVIIVDKNGR,GFVEPDHYVVVGAQR,LLNENSYVPR,HPVTGQFLYQDSNWASK,LFGNMEGDCPSDWK,EAGSQKDENLALYVENQFR,LVHANFGTK,YNSQLLSFVR,QVDGDNSHVEMK,LAQMFSDMVLKDGFQPSR,VEYHFLSPYVSPK,LAVDEEENADNNTK,LSEKLDSTDFTSTIK,SGVGTALLLK,LVYLVENPGGYVAYSK,LDSTDFTSTIK,RLYWDDLK,AVLGTSNFK,LTVSNVLK,AFTYINLDK,VANAESLNAIGVLIYMDQTK,ILNIFGVIK,DSAQNSVIIVDK,VSASPLLYTLIEK,EEPGEDFPAAR,AAAEVAGQFVIK,DQHFVK,SSGLPNIPVQTISR,DLNQYR,EMGLSLQWLYSAR,L…
P62263	RPS14	40S ribosomal protein S14		1	1	cytosol,membrane,mitochondrion,ribosome	cell differentiation,cell organization and biogenesis,metabolic process,regulation of biological process,transport	RNA binding,protein binding,structural molecule activity,translation regulator activity		203		0.75			4.6234	0	4	0	4	0	31.1		IEDVTPIPSDSTR,TKTPGPGAQSALR,ADRDESSPYAAMLAAQDVAQR,TPGPGAQSALR
Q9Y3U8	RPL36	60S ribosomal protein L36		1	1	cytoplasm,cytosol,membrane,ribosome	cell organization and biogenesis,metabolic process,transport	RNA binding,structural molecule activity		78		0.63			4.6234	0	3	0	3	0	26.6		EELSNVLAAMR,RAMELLK,EVCGFAPYER
E9PK25		Cofilin-1	1	1	2	cytoskeleton	cell organization and biogenesis	protein binding	524	750	4.12	9.11	2.21117	3.1246	3.9239	10	15	10	14	51.4	59.3	ESKKEDLVFIFWAPESAPLK,VFNDMK,LGGSAVISLEGKPL,KAVLFCLSEDKK,YALYDATYETK,NIILEEGKEILVGDVGQTVDDPYATFVK,HELQANCYEEVKDR,NIILEEGK,KEDLVFIFWAPESAPLK,EILVGDVGQTVDDPYATFVK	LGGSAVISLEGKPL,HELQANCYEEVKDR,SSTPEEVK,NIILEEGK,KEDLVFIFWAPESAPLK,AVLFCLSEDK,MLPDKDCR,ESKKEDLVFIFWAPESAPLK,VFNDMK,KAVLFCLSEDKK,AVLFCLSEDKK,YALYDATYETK,NIILEEGKEILVGDVGQTVDDPYATFVK,EILVGDVGQTVDDPYATFVK
A0A087WXM8	BCAM	Basal cell adhesion molecule		1	1	membrane	regulation of biological process,response to stimulus	protein binding,receptor activity,signal transducer activity		1164		1.99			3.7706	0	20	0	20	0	43		LVLAEAQVGDER,LNVFAKPEATEVSPNK,LEVPVEMNPEGYMTSR,LSVPPLVEVMR,GDGSPSPEYTLFR,DASFHCAAHYSLPEGR,EGDTVQLLCR,LASAEMQGSELQVTMHDTR,EGDEVTLICSAR,VAYLDPLELSEGK,DGISCEASNPHGNK,LSWSQLGGSPAEPIPGR,SPPYQLDSQGR,QGWVSSSLTLK,GQSGTYGCR,VEDYDAADDVQLSK,DGISCEASNPHGNKR,TAEIEPK,AGAAGTAEATAR,GTLSVMEDSAQEIATCNSR
P84085	ARF5	ADP-ribosylation factor 5	1	1	2	Golgi,cytoplasm,membrane	regulation of biological process,response to stimulus,transport	catalytic activity,nucleotide binding,protein binding,signal transducer activity	391	549	2.34	5.11	2.18376	1.6102	3.6416	7	11	6	9	40	60	HYFQNTQGLIFVVDSNDR,ILMVGLDAAGK,LGEIVTTIPTIGFNVETVEYK,HYFQNTQGLIFVVDSNDRER,DAVLLVFANK,VQESADELQK	HYFQNTQGLIFVVDSNDR,ILMVGLDAAGK,LGEIVTTIPTIGFNVETVEYK,LGLQHLR,HYFQNTQGLIFVVDSNDRER,QDMPNAMPVSELTDK,NICFTVWDVGGQDK,DAVLLVFANK,VQESADELQK
P08134	RHOC	Rho-related GTP-binding protein RhoC	1	1	2	cytosol,membrane,nucleus	cell organization and biogenesis,cellular component movement,regulation of biological process,response to stimulus	nucleotide binding,protein binding,signal transducer activity	129	284	0.52	2.06	3.96154	1.1544	3.6416	3	8	3	7	16	37.8	EVFEMATR,QVELALWDTAGQEDYDR,WTPEVK	EVFEMATR,TCLLIVFSK,EGVREVFEMATRAGLQVR,LVIVGDGACGK,QVELALWDTAGQEDYDR,ISAFGYLECSAK,WTPEVK
P61353	RPL27	60S ribosomal protein L27		1	1	cytosol,membrane,nucleus,ribosome	cell organization and biogenesis,metabolic process,transport	RNA binding,structural molecule activity		170		0.79			3.6416	0	4	0	4	0	36		VYNYNHLMPTR,YSVDIPLDK,VVLVLAGR,NIDDGTSDRPYSHALVAGIDR
P04626	ERBB2	Receptor tyrosine-protein kinase erbB-2		1	1	cytoplasm,cytosol,membrane,nucleus	cell differentiation,cell organization and biogenesis,cell proliferation,cellular component movement,metabolic process,regulation of biological process,response to stimulus	catalytic activity,nucleotide binding,protein binding,receptor activity,signal transducer activity		1842		1.8			3.5613	0	39	0	35	0	31.7		GIWIPDGENVKIPVAIK,ILKETELR,GLQSLPTHDPSPLQR,VLQGLPR,EIPDLLEK,GQECVEECR,GIWIPDGENVK,CWMIDSECRPR,LRLPASPETHLDMLR,SLTEILK,GAPPSTFK,GMSYLEDVR,CPSGVKPDLSYMPIWK,AVTSANIQEFAGCK,FRELVSEFSR,VLGSGAFGTVYK,ITDFGLAR,EILDEAYVMAGVGSPYVSR,EIPDLLEKGER,NNQLALTLIDTNR,LLQETELVEPLTPSGAMPNQAQMR,VCYGLGMEHLR,SGGGDLTLGLEPSEEEAPR,LLDIDETEYHADGGK,ACHPCSPMCK,NPQLCYQDTILWK,TVCAGGCAR,LGSQDLLNWCMQIAK,WMALESILR,SPLAPSEGAGSDVFDGD…
D3DVF0	F11R	F11 receptor, isoform CRA_a	1	1	2	membrane	cell organization and biogenesis,cellular component movement,defense response,regulation of biological process,response to stimulus,transport	protein binding,receptor activity	132	500	0.47	1.64	3.48936	0.9307	3.394	4	10	4	10	12.1	29.3	VTFLPTGITFK,VIYSQPSAR,FDQGDTTR,ITASYEDR	LVCYNNK,VTFLPTGITFK,LSCAYSGFSSPR,IPENNPVK,KVIYSQPSAR,NGYGTPMTSNAVR,VIYSQPSAR,FDQGDTTR,DGIVMPTNPK,ITASYEDR
O43278-2	SPINT1	Isoform 2 of Kunitz-type protease inhibitor 1		1	1	extracellular,membrane	regulation of biological process	enzyme regulator activity,protein binding		742		1.15			3.3288	0	14	0	14	0	26.9		YTSGFDELQR,WYYDPTEQICK,EEECILACR,KDPNQVELWGLK,KDVFGLR,QTEDYCLASNK,FTYGGCYGNK,TQGFGGSGIPK,VQPQEPLVLK,DVENTDWR,AWAGIDLK,GHCVDLPDTGLCK,EGFINYLTR,GVQGPSMER
B4DTF6	SPINT1	cDNA FLJ51604, highly similar to Kunitz-type protease inhibitor 1		1	1	extracellular,membrane	metabolic process,regulation of biological process	catalytic activity,enzyme regulator activity,protein binding		771		1.32			3.217	0	15	0	15	0	31		GSSGAQATFPQGPSMER,WYYDPTEQICK,KDPNQVELWGLK,QTEDYCLASNK,FTYGGCYGNK,TQGFGGSGIPK,GHCVDLPDTGLCK,EGFINYLTR,YTSGFDELQR,EEECILACR,KDVFGLR,GVQGGPLR,VQPQEPLVLK,DVENTDWR,AWAGIDLK
Q01105-2	SET	Isoform 2 of Protein SET		1	1	cytoplasm,cytosol,endoplasmic reticulum,nucleus	cell organization and biogenesis,metabolic process,regulation of biological process,transport	DNA binding,enzyme regulator activity,protein binding		264		0.48			3.217	0	5	0	5	0	19.4		LNEQASEEILK,QPFFQK,VEVTEFEDIK,EFHLNESGDPSSK,IDFYFDENPYFENK
A8K787	SLC25A4	cDNA FLJ75273, highly similar to Homo sapiens solute carrier family 25 (mitochondrial carrier; adenine nucleotide translocator), member 4, mRNA		1	1	membrane,mitochondrion,nucleus	cell organization and biogenesis,metabolic process,regulation of biological process,transport	protein binding,transporter activity		631		2.44			3.0842	0	13	0	13	0	39.2		AAYFGVYDTAK,GAWSNVLR,TAVAPIER,KGADIMYTGTVDCWR,LLLQVQHASK,EQGFLSFWR,YFPTQALNFAFK,DFLAGGVAAAVSK,GADIMYTGTVDCWR,GMLPDPK,GMGGAFVLVLYDEIK,GMGGAFVLVLYDEIKK,GNLANVIR
Q15907	RAB11B	Ras-related protein Rab-11B		1	1	cytoplasm,cytosol,endosome,membrane,mitochondrion	cell organization and biogenesis,metabolic process,regulation of biological process,response to stimulus,transport	catalytic activity,nucleotide binding,protein binding		403		1.77			2.9811	0	9	0	9	0	39.4		AITSAYYR,DDEYDYLFK,GAVGALLVYDIAK,AQIWDTAGQER,VVLIGDSGVGK,STIGVEFATR,NEFNLESK,AVPTDEAR,NILTEIYR
P62249	RPS16	40S ribosomal protein S16		1	1	cytosol,membrane,ribosome	cell organization and biogenesis,metabolic process,transport	RNA binding,protein binding,structural molecule activity		273		2.06			2.9811	0	6	0	6	0	38.3		FAGVDIR,LLEPVLLLGK,VNGRPLEMIEPR,ALVAYYQK,GPLQSVQVFGR,TLLVADPR
Q16625-3	OCLN	Isoform 3 of Occludin		1	1	membrane	cell organization and biogenesis,metabolic process,response to stimulus	protein binding		460		0.6			2.9811	0	9	0	9	0	25		EYPPITSDQQR,STPVPEVVQELPLTSPVDDFR,SLQSELDEINK,SLQSELDEINKELSR,NVSAGTQDVPSPPSDYVER,YSSGGNFETPSK,NFDTGLQEYK,LDKELDDYR,SNILWDKEHIYDEQPPNVEEWVK
F1AZF2		Cytochrome c oxidase subunit 2		1	1	membrane,mitochondrion	metabolic process,transport	catalytic activity,metal ion binding,transporter activity		177		0.44			2.9811	0	4	0	4	0	19.3		MMITSQDVLHSWAVPTLGLK,TDAIPFR,VVLPIEAPIR,LLDVDNR
Q6GMX6	IGHV4-31	IGH@ protein		1	1			protein binding		774		2.04			2.8986	0	16	0	14	0	38.2		DTLMISR,TPEVTCVVVDVSHEDPEVK,TTPPVLDSDGSFFLYSK,VVSVLTVLHQDWLNGKEYK,ALPAPIEK,STSGGTAALGCLVK,GPSVFPLAPSSK,GFYPSDIAVEWESNGQPENNYK,EEQYNSTYR,VVSVLTVLHQDWLNGK,LSSVTAADTAVYYCAR,NQVSLTCLVK,FNWYVDGVEVHNAK,EPQVYTLPPSR
B4DHY4	ANXA7	Annexin		1	1	cytosol,membrane,nucleus	cell differentiation,cell organization and biogenesis,cell proliferation,cellular homeostasis,metabolic process,regulation of biological process,response to stimulus	RNA binding,metal ion binding,protein binding		573		1.37			2.8986	0	13	0	13	0	32.9		LLVSMCQGNR,ATMEAYSR,TLGTMIAGDTSGDYR,GFGTDEQAIVDVVANR,EFSGYVESGLK,VLIEILCTR,LYYAMK,DENQSINHQMAQEDAQR,GAGTDDSTLVR,SEIDLVQIK,LYQAGEGR,DLLSSVSR,LGTDESCFNMILATR
O15031	PLXNB2	Plexin-B2	1	1	2	cell surface,membrane	cell proliferation,development,regulation of biological process,response to stimulus	protein binding,receptor activity,signal transducer activity	751	2807	0.37	1.84	4.97297	0.79008	2.8566	23	60	23	55	13.3	35.2	SDCSLCR,GPVDAVQK,VFFLPSK,SQLEGLEESVR,IIDQVYR,LFYEDGSGEK,VNTLMHYNVR,LVECGSLFK,YYDEIINALEEDPAAQK,EAFEAYTDHATYK,MVEDYYK,WTCQWDLR,VYLTPDGTSSEYDSILVEINKR,FMEPVTMQESGTFAFR,FGAQLQCVTGPQATR,AITEIYLTR,LQQIAAALENK,KLDFFR,HALLEEENR,EASPNPEDGIVR,AEEASHWLWSR,IQPETGPLGGGIR,VLYAVFSR	SDCSLCR,GPVDAVQK,EWVLGR,LPVQECLSYPTCTQCR,DLVLSGDLGSLYAMTQDK,LVECGSLFK,FAMVVIAEPLQSWQPPR,MVEDYYK,YFFDFLDEQAEK,FMEPVTMQESGTFAFR,DSQDPYCGWCVVEGR,AEEASHWLWSR,DGDKDVMITGK,DGATLILSK,DTTHNLPEFIVK,LQLEQQVATGPALDNKK,VGVSQQPEDSQQDLPGER,YYDEIINALEEDPAAQK,DSAGEPLYK,VYLTPDGTSSEYDSILVEINKR,TLTETDLYCEPPEVQPPPK,NACYTGTR,VEYDTR,GSSLHVGSDLLK,SSGGPGAGLCLFPLDK,EASPNPEDGIVR,AMTLQEAEAFVGAER,LQLEQQVATGPALDNK,VLYAVFSR,E…
O75054	IGSF3	Immunoglobulin superfamily member 3	1	1	2	cell surface,membrane	regulation of biological process,response to stimulus	protein binding	563	1733	0.36	1.19	3.30556	0.83718	2.8451	15	34	15	33	14.4	31.4	FQPVGTVEFHDLVTFTR,AVDGEWQIVGER,EARGQLK,VGEKPVEVISLSR,SEGAVVNVQPTDKEFTVR,DFMLHSSSEYAQR,LSPVLYR,ESDSVFVLK,TVTGEFIDKESK,HVSGGLFSLTVQR,QVTVQEGPLYR,NIPIIVLPLK,LHTVGEPVEFR,TSNLLEIR,LTEEESAPIGIR	QSLGEVR,AAFQLDCSIVSR,AVDGEWQIVGER,VGEKPVEVISLSR,SNIMWLDR,DGGVQWGDR,LSPVLYR,ESDSVFVLK,NIPIIVLPLK,LHTVGEPVEFR,EVQIVSTMDSSFPYAIYTQR,FSVIWQLVDR,SEGAVVNVQPTDK,SSFGGVQMEQVQPNSFSLGIFNSR,LAEEVSGR,FQPVGTVEFHDLVTFTR,EARGQLK,FAVAWYSLR,SEGAVVNVQPTDKEFTVR,QYFGSYSAK,DFMLHSSSEYAQR,LSQAQGNLSVLETR,TVTGEFIDKESK,HVSGGLFSLTVQR,LHLESPSPGVYR,YQCVAELWR,QVTVQEGPLYR,DATFHYGEQAAK,VLQPVTK,DGTVQPGSSYWER,TTHNSAFEYGTYAEEEGLR,…
G3V5Z7		Proteasome subunit alpha type		1	1	cytoplasm,cytosol,nucleus,proteasome	metabolic process	catalytic activity		357		1.17			2.8312	0	7	0	7	0	30.5		ILTEAEIDAHLVALAER,AINQGGLTSVAVR,QTESTSFLEK,HITIFSPEGR,YEAANWK,LYQVEYAFK,GKDCAVIVTQK
A5YM53	ITGAV	ITGAV protein	1	1	2	cell surface,cytosol,membrane	cell differentiation,cell growth,cell organization and biogenesis,cellular component movement,cellular homeostasis,metabolic process,regulation of biological process,response to stimulus,transport	metal ion binding,protein binding,receptor activity,signal transducer activity,transporter activity	441	1977	0.32	2.27	7.09375	0.50459	2.8075	10	44	10	40	10	37.2	LNGFEVFAR,TVEYAPCR,SAILYVK,LEVSVDSDQK,LQEVGQVSVSLQR,AGTQLLAGLR,YDPNVYSIK,YNNQLATR,MFLLVGAPK,GATDIDKNGYPDLIVGAFGVDR	ALFLYSR,SAILYVK,NGYPDLIVGAFGVDR,GGLMQCEELIAYLRDESEFR,LQEVGQVSVSLQR,DKLTPITIFMEYR,MFLLVGAPK,GSDGKLQEVGQVSVSLQR,AGTQLLAGLR,FSVHQQSEMDTSVK,YDPNVYSIK,GGLMQCEELIAYLR,VRPPQEEQER,SQDIDADGQGFCQGGFSIDFTK,DDPLEFK,CQPIEFDATGNR,ASGDFQTTK,TLGMVYIYDGK,TVEYAPCR,LEVSVDSDQK,NNGPSSFSK,SHQWFGASVR,IYIGDDNPLTLIVK,STGLNAVPSQILEGQWAAR,EPVGTCFLQDGTK,KGIVYIFNGR,ILACAPLYHWR,DYAKDDPLEFK,NNEALAR,LNGFEVFAR,GIVYIFNGR,FDLQIQSS…
P14384	CPM	Carboxypeptidase M	1	1	2	cell surface,extracellular,membrane	metabolic process	catalytic activity,metal ion binding	164	535	0.28	1.12	4	0.62378	2.7927	4	12	4	11	7.6	28.6	QEGMEAFLK,ASLIEYIK,IGIPEFK,ENYNQYDLNR	LPSFWNNNK,HICPYR,YVANMHGDETVGR,ASLIEYIK,NLWVLVVGR,SLTPDDDVFQYLAHTYASR,QPETVAVMK,GQVFDQNGNPLPNVIVEVQDR,IGIPEFK,IHIMPSMNPDGFEAVK,ENYNQYDLNR
B7Z9S8	ATP1B1	Sodium/potassium-transporting ATPase subunit beta		1	1	membrane	cell communication,cell organization and biogenesis,cellular component movement,cellular homeostasis,metabolic process,regulation of biological process,response to stimulus,transport	catalytic activity,enzyme regulator activity,metal ion binding,nucleotide binding,protein binding,transporter activity		403		1.97			2.4551	0	8	0	8	0	37.2		DDMIFEDCGDVPSEPK,AYGENIGYSEKDR,VAPPGLTQIPQIQK,YNPNVLPVQCTGK,AYGENIGYSEK,SYEAYVLNIVR,TEISFRPNDPK,LLTISEFKPTYQDR
O43570-2	CA12	Isoform 2 of Carbonic anhydrase 12		1	1	membrane	metabolic process,transport	catalytic activity,metal ion binding		282		0.78			2.4551	0	7	0	7	0	24.1		YKGQEAFVPGFNIEELLPER,LNLPSDMHIQGLQSR,TAEYYR,QFLLTNNGHSVK,GVIYKPATK,WTYFGPDGENSWSK,EMINNFR
Q969P0-3	IGSF8	Isoform 3 of Immunoglobulin superfamily member 8		1	1					537		1.09			2.3246	0	12	0	12	0	28.3		DTQFSYAVFK,VVAGEVQVQR,LQGDAVVLK,LVAQLDTEGVGSLGPGYEGR,SVPEAPVGR,SDLAVEAGAPYAER,MTVHEGQELALGCLAR,LQAQDAGIYECHTPSTDTR,QAPTSPPR,STLQEVVGIR,VLPDVLQVSAAPPGPR,YLGSYSGK
P02545-3	LMNA	Isoform ADelta10 of Prelamin-A/C		1	1	cytosol,membrane,nucleus	cell organization and biogenesis,regulation of biological process,response to stimulus,transport	protein binding,structural molecule activity		1284		1.83			2.2481	0	25	0	25	0	39.1		VAVEEVDEEGK,LKDLEALLNSK,SVGGSGGGSFGDNLVTR,VAVEEVDEEGKFVR,LRDLEDSLAR,LEAALGEAK,SGAQASSTPLSPTR,AAYEAELGDAR,NIYSEELR,IDSLSAQLSQLQK,LADALQELR,VREEFK,NSNLVGAAHEELQQSR,EGDLIAAQAR,TLEGELHDLR,LSPSPTSQR,DLEDSLAR,LAVYIDR,LLEGEEER,MQQQLDEYQELLDIK,LQLELSK,SLETENAGLR,EAALSTALSEK,LQEKEDLQELNDR,ITESEEVVSR
H0YFA4		Cysteine-rich protein 2	1	1	2			metal ion binding	62	162	0.16	1.08	6.75	0.77828	2.1623	2	5	2	4	13	39.5	FEENGRRAR,ASSVTTFTGEPNTCPR	FEENGRRAR,ASSVTTFTGEPNTCPR,GVNTGAVGSYIYDRDPEGK,GVNIGGAGSYIYEKPLAEGPQVTGPIEVPAAR
Q05DH1	PSMA7	Proteasome subunit alpha type		1	1	cytoplasm,cytosol,nucleus,proteasome	metabolic process,regulation of biological process,response to stimulus,transport	catalytic activity,protein binding		393		1.27			2.1623	0	8	0	8	0	37.8		NYTDEAIETDDLTIK,AITVFSPDGHLFQVEYAQEAVK,ALLEVVQSGGK,DIVVLGVEK,NIELAVMR,GRDIVVLGVEK,ILNPEEIEK,LTVEDPVTVEYITR
Q504R6	RAB13	RAB13 protein	1	1	2	Golgi,cytosol,endosome,membrane	cell organization and biogenesis,cellular component movement,regulation of biological process,response to stimulus,transport	catalytic activity,nucleotide binding,protein binding	273	412	0.99	2.14	2.16162	1.7384	2.1623	7	9	7	9	28.6	34.8	SSMNVDEAFSSLAR,SIKENASAGVER,TITTAYYR,LLLIGDSGVGK,FFETSAK,TVDIEGK,LQVWDTAGQER	SSMNVDEAFSSLAR,ENASAGVER,SIKENASAGVER,LLLIGDSGVGK,TITTAYYR,GAMGIILVYDITDEK,FFETSAK,TVDIEGK,LQVWDTAGQER
O75947	ATP5H	ATP synthase subunit d, mitochondrial		1	1	cytosol,membrane,mitochondrion	metabolic process,transport	catalytic activity,transporter activity		183		1.31			2.1623	0	5	0	5	0	26		SCAEWVSLSK,IVEYEK,AGLVDDFEK,YTAQVDAEEK,VPVPEDK
A0A0C4DGQ5	CAPNS1	Calpain small subunit 1		1	1	cytosol,membrane	cell death,cell organization and biogenesis,metabolic process,regulation of biological process	catalytic activity,metal ion binding,protein binding		329		0.92			2.1623	0	8	0	7	0	22.9		WQAIYK,LDAMFR,YLWNNIK,THYSNIEANESEEVR,TDGFGIDTCR,LFAQLAGDDMEVSATELMNILNK,LGFEEFK
B4E2D8	PCDH1	cDNA FLJ59655, highly similar to Protocadherin-1		1	1	membrane,nucleus	cell communication	metal ion binding		824		0.63			2.1623	0	18	0	18	0	17.1		AQVVVTVK,NTGLITVQGPVDR,DMNDNAPTIEIR,VTVLDTNDNAPK,WDSYDLTIK,QPQLIVMGNLDR,LEVGAPYLR,ESYELK,EQQSTYTFQLK,TGDIFTTETSIDR,FNLMSDAPGDSPR,GLFTISPETGEIQVK,YFLQTTTPLDYEK,AVDGGVPPR,EDLSTLR,LLTPQTR,NTGLITVQGPVDREDLSTLR,VQDGGSPPR
A0A059RTC0		ATP synthase subunit A	1	1	2	membrane,mitochondrion	metabolic process,transport	transporter activity	142	146	0.14	0.29	2.07143	2.1623	2.1623	4	5	4	4	7	7	YLINNR,YLINMR,LITTQQWLIK,YLINFR	YLINNR,LITTQQWLIK,YLINER,YLINFR
P21266	GSTM3	glutathione S-transferase Mu 3	1	1	2	cytoplasm,cytosol,nucleus	metabolic process,response to stimulus	catalytic activity,protein binding	328	440	1.01	2.21	2.18812	1.0691	1.9764	6	10	6	9	28.8	43.1	ITQSNAILR,QFSMFLGK,LLLEFTDTSYEEK,LKPQYLEELPGQLK,CLDEFPNLK,IAAYLQSDQFCK	ITQSNAILR,QFSMFLGK,YTCGEAPDYDR,LLLEFTDTSYEEK,IRVDIIENQVMDFR,LKPQYLEELPGQLK,CLDEFPNLK,IAAYLQSDQFCK,SQWLDVK
H3BV55		phosphomannomutase		1	1	cytoplasm,cytosol,nucleus	metabolic process	catalytic activity		320		1.36			1.9286	0	7	0	7	0	31.9		IEFYELDK,GTFIEFR,NGMLNVSPIGR,TIYFFGDK,TMGYSVTAPEDTR,VQEQLGNDVVEK,IGVVGGSDFEK
P05026	ATP1B1	Sodium/potassium-transporting ATPase subunit beta-1	1	1	2	membrane	cell communication,cell organization and biogenesis,cellular component movement,cellular homeostasis,metabolic process,regulation of biological process,response to stimulus,transport	catalytic activity,enzyme regulator activity,metal ion binding,nucleotide binding,protein binding,transporter activity	205	407	0.56	1.45	2.58929	0.84785	1.9286	4	8	4	8	16.1	28	VAPPGLTQIPQIQK,YNPNVLPVQCTGK,SYEAYVLNIVR,AYGENIGYSEK	DDMIFEDCGDVPSEPK,AYGENIGYSEKDR,VAPPGLTQIPQIQK,YNPNVLPVQCTGK,FIWNSEK,AYGENIGYSEK,SYEAYVLNIVR,TEISFRPNDPK
A0A075B6N8		immunoglobulin heavy constant gamma 3 (G3m marker)	1	1	2			protein binding	41	395	0.08	0.97	12.125	0.16591	1.9286	1	9	1	8	1.8	21.4	DTLMISR	DTLMISR,VVSVLTVLHQDWLNGK,VVSVLTVLHQDWLNGKEYK,STSGGTAALGCLVK,ALPAPIEK,NQVSLTCLVK,EPQVYTLPPSR,GPSVFPLAPCSR
P01861	IGHG4	Immunoglobulin heavy constant gamma 4		1	1	extracellular,membrane	cell organization and biogenesis,defense response,metabolic process,regulation of biological process,response to stimulus	catalytic activity,protein binding		331		1.01			1.8943	0	8	0	7	0	25.6		DTLMISR,VVSVLTVLHQDWLNGK,STSESTAALGCLVK,VVSVLTVLHQDWLNGKEYK,NQVSLTCLVK,GFYPSDIAVEWESNGQPENNYK,GPSVFPLAPCSR
Q9Y276	BCS1L	Mitochondrial chaperone BCS1	1	1	2	membrane,mitochondrion	cell organization and biogenesis,metabolic process	DNA binding,RNA binding,catalytic activity,nucleotide binding,protein binding	42	474	0.07	0.82	11.7143	0.11034	1.848	1	10	1	10	4	31.5	TQHLSVETSYLQHESGR	DVQEFIDNPK,FYPGQAPSLAENFAEHVLR,GYLLYGPPGCGK,ELALQQEEGK,NDPVGAIHNAESLR,TQHLSVETSYLQHESGR,DLAVENPVK,FEFVPSPGNHFIWYR,RPLNSVVLQQGLADR,KVFFNILEEAR
P62753	RPS6	40S RIBOSOMAL PROTEIN S6		1	1	cytoplasm,cytosol,membrane,nucleus,ribosome	cell death,cell differentiation,cell organization and biogenesis,cell proliferation,metabolic process,regulation of biological process,response to stimulus,transport	RNA binding,protein binding,structural molecule activity		255		1.15			1.848	0	5	0	5	0	19.2		RQEQIAK,QGVLTHGR,MATEVAADALGEEWK,NKEEAAEYAK,LIEVDDER
Q4QQP8	PTGFRN	PTGFRN protein	1	1	2	Golgi,cell surface,membrane	cell organization and biogenesis	protein binding	88	932	0.07	1.21	17.2857	0.16591	1.7826	3	20	3	20	4.1	29.3	EGEPFELR,AVEVATVVIQPTVLR,LDTVGSDAYR	VDGVVLEK,ADDVRPEVTWSFSR,FHPGLGYEQR,EGEPFELR,AQDGDFIFSK,EHTDTFNFR,YIISLDQDSVVK,GNYYCVVSAWTK,KGIVTTSR,DSLVHSSPHVALSHVDAR,AVEVATVVIQPTVLR,MYQTQVSDAGLYR,SVLALTHEGR,VPGFADDPTELACR,VQEDEFR,EAEIHSKPVFITVK,CIVSEWIAEQGNWQEIQEK,ALSADQGSYR,APVLLSSLDR,LDTVGSDAYR
A0A087WTX5		Ig kappa chain C region		1	1					269		1.33			1.7826	0	4	0	4	0	29.2		VYACEVTHQGLSSPVTK,TVAAPSVFIFPPSDEQLK,VDNALQSGNSQESVTEQDSK,DSTYSLSSTLTLSK
H0YN26		Acidic leucine-rich nuclear phosphoprotein 32 family member A		1	1			protein binding		140		0.59			1.7826	0	4	0	4	0	22		ELVLDNSR,VSGGLEVLAEK,LLPQLTYLDGYDR,LELSDNR
P56537	EIF6	eukaryotic translation initiation factor 6	1	1	2	cytoplasm,cytosol,nucleus	cell organization and biogenesis,metabolic process,regulation of biological process,response to stimulus,transport	RNA binding,protein binding	125	205	0.26	0.79	3.03846	1.1544	1.7826	3	4	3	4	17.1	21.6	LNEAQPSTIATSMR,HGLLVPNNTTDQELQHIR,NSLPDTVQIR	LNEAQPSTIATSMR,ETEEILADVLK,HGLLVPNNTTDQELQHIR,NSLPDTVQIR
A0A0A0MSA9	PVR	Poliovirus receptor	1	1	2	cell surface,cytoplasm,membrane	cell organization and biogenesis,regulation of biological process	protein binding,receptor activity	55	189	0.08	0.34	4.25	0.6681	1.7826	2	4	2	4	5.6	14.2	VLAKPQNTAEVQK,QAELTVQVK	VLAKPQNTAEVQK,QAELTVQVK,VQLTGEPVPMAR,HGESGSMAVFHQTQGPSYSESK
Q9H3N1	TMX1	Thioredoxin-related transmembrane protein 1		1	1	endoplasmic reticulum,membrane	cellular homeostasis,metabolic process,regulation of biological process,response to stimulus,transport	catalytic activity		168		0.48			1.7826	0	4	0	4	0	14.2		VDVTEQPGLSGR,LLSESAQPLK,SLGPSLATDK,VITDENWR
Q6N093	IGHG2	Putative uncharacterized protein DKFZp686I04196		1	1	extracellular	cell organization and biogenesis,defense response,metabolic process,regulation of biological process,response to stimulus	catalytic activity,protein binding		322		0.61			1.7384	0	7	0	7	0	20.1		DTLMISR,GLPAPIEK,STSESTAALGCLVK,NQVSLTCLVK,GFYPSDIAVEWESNGQPENNYK,EPQVYTLPPSR,GPSVFPLAPCSR
P00441	SOD1	Superoxide dismutase [Cu-Zn]	1	1	2	cytoplasm,cytosol,extracellular,membrane,mitochondrion,nucleus,organelle lumen,vacuole	cell organization and biogenesis,cellular component movement,cellular homeostasis,metabolic process,regulation of biological process,response to stimulus,transport	antioxidant activity,catalytic activity,metal ion binding,protein binding	120	204	0.46	1.14	2.47826	1.6827	1.6827	3	3	3	3	23.3	32.4	LACGVIGIAQ,GDGPVQGIINFEQK,HVGDLGNVTADK	DGVADVSIEDSVISLSGDHCIIGR,GDGPVQGIINFEQK,HVGDLGNVTADK
P68036	UBE2L3	Ubiquitin-conjugating enzyme E2 L3	1	1	2	cytoplasm,cytosol,nucleus	cell proliferation,metabolic process,regulation of biological process,response to stimulus	RNA binding,catalytic activity,enzyme regulator activity,nucleotide binding,protein binding	60	147	0.19	0.68	3.57895	0.3895	1.6827	1	3	1	3	5.8	29.8	ADLAEEYSK	IEINFPAEYPFKPPK,ADLAEEYSK,TDQVIQSLIALVNDPQPEHPLR
A0A024R3B9	CRYAB	Alpha-crystallin B chain	1	1	2	Golgi,cell surface,cytoplasm,cytoskeleton,nucleus	cell organization and biogenesis,metabolic process,regulation of biological process,response to stimulus	metal ion binding,protein binding,structural molecule activity	51	79	0.28	0.64	2.28571	0.9307	1.6827	2	3	2	3	17.5	27.7	HFSPEELK,EEKPAVTAAPK	FSVNLDVK,VLGDVIEVHGK,EEKPAVTAAPK
H0YC42		Uncharacterized protein		1	1					388		1.02			1.6827	0	6	0	6	0	25.8		ASAAFSSVGSVITK,TSETLSQAGQK,LGINSLQELK,GWQDVTATSAYK,VEEEIQTLSQVLAAK,NVESFASMLR
H0YIC4		citrate synthase		1	1	membrane	metabolic process	catalytic activity		161		0.91			1.6827	0	3	0	3	0	24.3		IVPNVLLEQGK,VVPGYGHAVLR,ALGFPLER
Q14103	HNRNPD	heterogeneous nuclear ribonucleoprotein D0		1	1	cytoplasm,cytosol,nucleus	cell organization and biogenesis,metabolic process,regulation of biological process,response to stimulus	DNA binding,RNA binding,nucleotide binding,protein binding		246		0.64			1.6827	0	6	0	6	0	19.4		IREYFGGFGEVESIELPMDNK,FGEVVDCTLK,HSEAATAQR,GFGFVLFK,LDPITGR,IFVGGLSPDTPEEK
P12035	KRT3	Keratin, type II cytoskeletal 3		1	1	cytosol	cell death,cell differentiation,cell organization and biogenesis	structural molecule activity		991		1.7			1.6264	0	20	0	19	0	21.6		SGAGGFGSR,YEDEINKR,LALDVEIATYR,KLLEGEEYR,TAAENEFVTLKK,LLEGEEYR,FASFIDK,YEDEINK,SLDLDSIIAEVR,FASFIDKVR,MSCVAHSGGAGGGAYGFR,SYLDNILGER,KYEDEINK,KYEDEINKR,TAAENEFVTLK,DYQELMNVK,AQYEDIAQR,SISISVAAGGSR,FLEQQNK
Q9P2B2	PTGFRN	prostaglandin F2 receptor negative regulator		1	1	Golgi,cell surface,endoplasmic reticulum,membrane	cell organization and biogenesis	protein binding		953		1.04			1.6102	0	21	0	21	0	25.9		VDGVVLEK,ADDVRPEVTWSFSR,FHPGLGYEQR,EGEPFELR,AQDGDFIFSK,YIISLDQDSVVK,EHTDTFNFR,KGIVTTSR,DSLVHSSPHVALSHVDAR,GNYYCVVSAWTK,MYQTQVSDAGLYR,SVLALTHEGR,VPGFADDPTELACR,VQEDEFR,EAEIHSKPVFITVK,RTANDAVELHIK,CIVSEWIAEQGNWQEIQEK,TANDAVELHIK,APVLLSSLDR,LDTVGSDAYR,ALSADQGSYR
P42126-2	ECI1	Isoform 2 of Enoyl-CoA delta isomerase 1, mitochondrial		1	1	membrane,mitochondrion,organelle lumen	metabolic process	catalytic activity		291		0.66			1.6102	0	5	0	5	0	17.8		AVQELWLR,SLQMYLER,ILADNPR,DADVQNFVSFISK,VLVEPDAGAGVAVMK
P15529-10	CD46	Isoform 2 of Membrane cofactor protein		1	1					298		0.65			1.6102	0	6	0	6	0	12.9		GTYLTDETHR,KGTYLTDETHR,GSVAIWSGKPPICEK,ATVMFECDK,VLCTPPPK,ETCPYIR
P09543-2	CNP	Isoform CNPI of 2',3'-cyclic-nucleotide 3'-phosphodiesterase	1	1	2	cytoplasm,membrane	cell communication,cell differentiation,cell organization and biogenesis,metabolic process,response to stimulus	RNA binding,catalytic activity,nucleotide binding	142	495	0.32	1.16	3.625	0.40653	1.5551	4	11	4	11	11.7	30.6	APGAEEYAQQDVLK,AIFTGYYGK,NQWQLSADDLK,AGQVFLEELGNHK	LDCAQLK,LDEDLAAYCR,VELSEQQLQLWPSDVDK,APGAEEYAQQDVLK,WMLTLAK,GAFSEEYK,AIFTGYYGK,LEQLFEMADQYQYQVVLVEPK,NQWQLSADDLK,AGQVFLEELGNHK,TLFILR
P61019	RAB2A	Ras-related protein Rab-2A		1	1	Golgi,cytosol,endoplasmic reticulum,membrane,nucleus	cell organization and biogenesis,regulation of biological process,response to stimulus,transport	catalytic activity,nucleotide binding,protein binding		243		1.52			1.5119	0	6	0	6	0	36.3		GAAGALLVYDITR,DTFNHLTTWLEDAR,TASNVEEAFINTAK,YIIIGDTGVGK,LQIWDTAGQESFR,EHGLIFMETSAK
A0A0A8LFF7	HLA-E	MHC class I antigen		1	1	cell surface,membrane	defense response,regulation of biological process,response to stimulus	protein binding		59		0.66			1.5119	0	2	0	2	0	20.1		DTAQIFR,FISVGYVDDTQFVR
H0YCT5		Histone-binding protein RBBP4		1	1			protein binding		98		0.36			1.5119	0	2	0	2	0	9.4		RLNVWDLSK,TVALWDLR
O95197-3	RTN3	Isoform 3 of Reticulon-3	1	1	2	endoplasmic reticulum,membrane	cell death,cell organization and biogenesis,transport	protein binding	47	75	0.13	0.28	2.15385	0.58489	1.5119	1	2	1	2	4.6	8	TQIDHYVGIAR	TQIDHYVGIAR,SVIQAVQK
Q8WTV0-2	SCARB1	Isoform 1 of Scavenger receptor class B member 1	1	1	2	cell surface,cytoplasm,membrane	cell organization and biogenesis,cell proliferation,cellular component movement,metabolic process,regulation of biological process,response to stimulus,transport	protein binding,receptor activity,signal transducer activity,transporter activity	48	374	0.12	0.56	4.66667	0.29155	1.4484	2	7	2	7	3.5	15.9	GSVLQEAK,SVAGIGQTGK	DKEAIQAYSESLMTSAPK,LIMTLAFTTLGER,LQLSLYMK,IDPSSLSFNMWK,ESGVFEGIPTYR,TFQFQPSK,SVAGIGQTGK
A0A087WYS1		UTP--glucose-1-phosphate uridylyltransferase	1	1	2		metabolic process	catalytic activity	239	488	0.4	0.85	2.125	0.61026	1.395	6	11	6	11	11.8	23.6	VQDYLR,GGTLTQYEGK,EFPTVPLVK,NENTFLDLTVQQIEHLNK,LVEIAQVPK,QELELSVK	VQDYLR,GGTLTQYEGK,GLPDNISSVLNK,GPSVDWGK,EFPTVPLVK,NENTFLDLTVQQIEHLNK,IQRPPEDSIQPYEK,SFENSLGINVPR,LVEIAQVPK,QELELSVK,ILTTASSHEFEHTK
Q2TTR7	EGFR	Receptor protein-tyrosine kinase		1	1	cell surface,cytoplasm,endosome,membrane,nucleus,organelle lumen	cell organization and biogenesis,cell proliferation,cellular component movement,metabolic process,regulation of biological process,response to stimulus	DNA binding,catalytic activity,enzyme regulator activity,nucleotide binding,protein binding,receptor activity,signal transducer activity		1072		0.67			1.395	0	23	0	22	0	21.3		VLGSGAFGTVYK,GDSFTHTPPLDPQELDILK,NYDLSFLK,ELIIEFSK,FSNNPALCNVESIQWR,IICAQQCSGR,NLCYANTINWK,WMALESILHR,TDLHAFENLEIIR,GLWIPEGEK,LFGTSGQK,GMNYLEDR,GSTAENAEYLR,ELVEPLTPSGEAPNQALLR,IPLENLQIIR,NYVVTDHGSCVR,YLVIQGDER,LPQPPICTIDVYMIMVK,EISDGDVIISGNK,ITDFGLAK,NLQEILHGAVR,LTQLGTFEDHFLSLQR
A4D1S0	KLRG2	killer cell lectin-like receptor subfamily G member 2		1	1	membrane				278		0.55			1.3714	0	6	0	6	0	16.8		HSWVGAWR,AAGAGLEPSSK,AGLDGDEKLPR,EDAALLPR,VRQPEGPESSPSPAGAVEK,AVTLTGLPMYVK
B4DP27	TMED2	cDNA FLJ52153, highly similar to Transmembrane emp24 domain-containing protein 2		1	1	Golgi,endoplasmic reticulum,membrane	cell organization and biogenesis,regulation of biological process,transport	protein binding		112		0.62			1.3714	0	3	0	3	0	16.5		IVMFTIDIGEAPK,FCFSNR,HEQEYMEVR
P05556	ITGB1	Integrin beta-1	1	1	2	cell surface,cytoplasm,endosome,membrane	cell differentiation,cell growth,cell organization and biogenesis,cellular component movement,defense response,metabolic process,regulation of biological process,response to stimulus,transport	enzyme regulator activity,metal ion binding,protein binding,receptor activity,signal transducer activity	137	502	0.11	0.42	3.81818	0.24094	1.3714	3	11	3	11	4.5	16.2	LKPEDITQIQPQQLVLR,SAVTTVVNPK,IGFGSFVEK	GICECGVCK,LSEGVTISYK,SLGTDLMNEMR,SGEPQTFTLK,LKPEDITQIQPQQLVLR,NVLSLTNKGEVFNELVGK,WDTGENPIYK,SAVTTVVNPK,IGFGSFVEK,DKLPQPVQPDPVSHCK,DNTNEIYSGK
B4DDE5	SLC5A6	cDNA FLJ56614, highly similar to Sodium-dependent multivitamin transporter	1	1	2	membrane	metabolic process,transport	transporter activity	45	126	0.07	0.15	2.14286	0.33352	1.3714	1	3	1	3	3	10	SLNPATIYPVLPK	SLNPATIYPVLPK,SYGQDHLDTGLFPEKPR,ISGFELDPDPFVR
B4DDZ4	ANXA4	Annexin		1	1	cell surface,cytoplasm,membrane,nucleus	cell differentiation,regulation of biological process,response to stimulus	enzyme regulator activity,metal ion binding,protein binding		380		0.92			1.3101	0	8	0	8	0	27		DEGNYLDDALVR,ISQTYQQQYGR,SAYFAEK,QDAQDLYEAGEK,FLTVLCSR,AEIDMLDIR,AASGFNAMEDAQTLR,SLEDDIR
H0Y7A7		Calmodulin	1	1	2			metal ion binding,protein binding	32	121	0.16	0.56	3.5	0.23285	1.3101	1	3	1	3	3.7	21.3	ELGTVMR	EAFSLFDKDGDGTITTK,ELGTVMR,VFDKDGNGYISAAELR
Q5U0H8	MPZL1	Myelin protein zero-like 1		1	1	cell surface,membrane	cell communication,regulation of biological process,response to stimulus	protein binding,structural molecule activity		218		0.71			1.3101	0	4	0	4	0	15.9		ISWAGDLDK,SESVVYADIR,NPPDIVVQPGHIR,KSPSDTEGLVK
P14868	DARS	Aspartate--tRNA ligase, cytoplasmic		1	1	cytoplasm,cytosol,membrane	cell organization and biogenesis,metabolic process	RNA binding,catalytic activity,nucleotide binding,protein binding		672		1.18			1.2855	0	14	0	14	0	29.9		FQTEIQTVNK,FLEPTLR,LPLQLDDAVRPEAEGEEEGR,ATVNQDTR,GFVEIQTPK,IGSCTQQDVELHVQK,QTSMFPR,QCFLVLR,LQSGICHLFR,QQQFNVQALVAVGDHASK,ESIVDVEGVVR,EIMDAAEDYAK,FAANINK,IHDPQLLTER
P61106	RAB14	Ras-related protein Rab-14	1	1	2	Golgi,cytosol,endoplasmic reticulum,endosome,membrane,vacuole	cell organization and biogenesis,defense response,metabolic process,regulation of biological process,response to stimulus,transport	catalytic activity,nucleotide binding,protein binding	129	264	0.48	1.18	2.45833	0.63789	1.2758	3	6	3	6	13	37.2	IIEVSGQK,LQIWDTAGQER,LTSEPQPQR	ADLEAQR,NLTNPNTVIILIGNK,IIEVSGQK,IYQNIQDGSLDLNAAESGVQHKPSAPQGGR,LQIWDTAGQER,LTSEPQPQR
Q9UHQ9	CYB5R1	NADH-cytochrome b5 reductase 1		1	1	membrane,mitochondrion	metabolic process,transport	catalytic activity,nucleotide binding,protein binding		263		0.59			1.2758	0	5	0	5	0	16		MSQYLDSLK,GPSGLLTYTGK,EDLEELQAR,VGDVVEFR,RPQVTLLDPNEK
Q9BV61	TRAP1	Trap1 protein		1	1	membrane,mitochondrion,organelle lumen	metabolic process,regulation of biological process,response to stimulus	RNA binding,nucleotide binding,protein binding		879		1.07			1.2675	0	19	0	18	0	27.4		FFEDYGLFMR,EFSSEAR,LISVETDIVVDHYKEEK,ELLQESALIR,GVVDSEDIPLNLSR,AQLLQPTLEINPR,LLDIVAR,DVLQQR,ELISNASDALEK,EGIVTATEQEVKEDIAK,FFIDQSK,TDAPLNIR,EGIVTATEQEVK,LNELLVK,AFLDALQNQAEASSK,LVSDGQALPEMEIHLQTNAEK,KLLDIVAR,YESSALPSGQLTSLSEYASR
P17301	ITGA2	Integrin alpha-2	1	1	2	cell surface,membrane,nucleus	cell differentiation,cell organization and biogenesis,cell proliferation,cellular component movement,coagulation,regulation of biological process,response to stimulus	metal ion binding,protein binding,receptor activity,signal transducer activity	283	748	0.19	0.41	2.15789	0.53478	1.2327	8	16	8	15	6.4	14.9	VVFNLNTYK,ILGSDGAFR,TQVGLIQYANNPR,FVQGLDIGPTK,IGQTSSSVSFK,VYLFTIK,AIASIPTER,NAQIILK	SHLQYFGR,VMVVVTDGESHDGSMLK,TQVGLIQYANNPR,YAYSAASGGR,IGQTSSSVSFK,AIASIPTER,NAQIILK,VVFNLNTYK,VDISLENPGTSPALEAYSETAK,ILGSDGAFR,AGDISCNADINPLK,QIPAAQEQPFIVSNQNK,FVQGLDIGPTK,SVACDVGYPALK,VYLFTIK
Q7Z3Z9	L1CAM	L1 cell adhesion molecule	1	1	2	cell surface,membrane	cellular component movement,regulation of biological process,response to stimulus	protein binding	174	754	0.12	0.41	3.41667	0.24262	1.1859	5	19	5	19	4.3	16.4	FQLQATTK,VKDATQITQGPR,AQLLVVGSPGPVPR,TIIQKEPIDLR,WRPVDLAQVK	DLQELGDSDK,DATQITQGPR,AFGAPVPSVQWLDEDGTTVLQDER,AQLLVVGSPGPVPR,TIIQKEPIDLR,CLAENSLGSAR,DLQELGDSDKYFIEDGR,FQGIYR,FQLQATTK,VSWSPAEDHNAPIEK,VKDATQITQGPR,YDIEFEDKEMAPEK,YFIEDGR,LMAEGAPK,LVLSDLHLLTQSQVR,LSPYVHYTFR,WRPVDLAQVK,EGPGEAIVR,YGPGEPSPVSETVVTPEAAPEK
R4GN08		Actin-related protein 2/3 complex subunit 4		1	1	cytoskeleton	cell organization and biogenesis,regulation of biological process			87		0.87			1.1544	0	2	0	2	0	20.7		AENFFILR,IVAEEFLK
P38117-2	ETFB	Isoform 2 of Electron transfer flavoprotein subunit beta	1	1	2	cytosol,organelle lumen	metabolic process	protein binding	38	239	0.09	0.52	5.77778	0.13646	1.1544	1	6	1	6	2.8	19.6	VETTEDLVAK	IEVIKPGDLGVDLTSK,EIDGGLETLR,VETTEDLVAK,LKLPAVVTADLR,VDLVLLGK,LSVISVEDPPQR
Q5T2L0	VTCN1	V-set domain-containing T-cell activation inhibitor 1		1	1	membrane	regulation of biological process,response to stimulus,transport	catalytic activity,protein binding		220		0.65			1.1544	0	5	0	5	0	18.5		NVQLTDAGTYK,EGKDELSEQDEMFR,EGVLGLVHEFK,LSDIVIQWLK,VTESEIK
P49006	MARCKSL1	MARCKS-related protein		1	1	cytoplasm,membrane	regulation of biological process	protein binding		78		0.37			1.1544	0	2	0	2	0	14.3		GDVTAEEAAGASPAK,AAATPESQEPQAK
Q53F35	ANP32B	acidic (leucine-rich) nuclear phosphoprotein 32 family, member B variant	1	1	2	cytoplasm,nucleus	cell organization and biogenesis,metabolic process,regulation of biological process	protein binding	75	119	0.12	0.39	3.25	0.6681	1.1544	2	3	2	3	7.6	12.8	IFGGLDMLAEK,ELVLDNCK	LLPQLTYLDGYDR,KLELSENR,IFGGLDMLAEK
B4DMV6	EIF4H	cDNA FLJ60708, highly similar to Eukaryotic translation initiation factor 4H		1	1	cytosol,membrane	cell organization and biogenesis,metabolic process,regulation of biological process,reproduction	RNA binding,catalytic activity,nucleotide binding,protein binding		81		0.48			1.1544	0	2	0	2	0	11.3		VDIAEGR,AYSSFGGGR
B1AMW1	CD58	CD58 antigen, (lymphocyte function-associated antigen 3), isoform CRA_c		1	1	cell surface,membrane	cellular component movement,regulation of biological process,response to stimulus,transport	protein binding		85		0.26			1.1544	0	2	0	2	0	7.5		VAELENSEFR,MENDLPQK
B4DEA8		cDNA FLJ56425, highly similar to Very-long-chain specific acyl-CoAdehydrogenase, mitochondrial		1	1		metabolic process	catalytic activity,nucleotide binding		767		0.89			1.1163	0	14	0	14	0	23.8		LFVALQGCMDK,GGVVTSNPLGF,IFGSEAAWK,ASNTAEVFFDGVR,EGMAALQSDPWQQELYR,VPSENVLGEVGSGFK,ITAFVVER,IFEGTNDILR,TSAVPSPCGK,GILLFGTK,FFEEVNDPAK,LASGETVAAFCLTEPSSGSDAASIR,SFAVGMFK,ALEQFATVVEAK
P49419-2	ALDH7A1	Isoform 2 of Alpha-aminoadipic semialdehyde dehydrogenase	1	1	2	cytosol,mitochondrion,nucleus,organelle lumen	metabolic process	catalytic activity,protein binding	60	273	0.12	0.41	3.41667	0.20226	1.0893	2	8	2	8	3.3	17.8	EGGTVVYGGK,QIGDALR	EGGTVVYGGK,FKNEEEVFAWNNEVK,GAPTTSLISVAVTK,QIGDALR,QASVADYEETVKK,QVGLMVQER,DLPLAQGIK,VNLLSFTGSTQVGK
B4DU18	CDH5	cDNA FLJ51093, highly similar to Cadherin-5	1	1	2	cell surface,membrane	cell organization and biogenesis,regulation of biological process,response to stimulus	metal ion binding,protein binding	77	398	0.04	0.31	7.75	0.31826	1.0893	3	8	3	8	3.8	12.5	HSIGYSIR,ELDSTGTPTGK,YTFVVPEDTR	HSIGYSIR,GKEYFAIDNSGR,ELDSTGTPTGK,VDAETGDVFAIER,KPLIGTVLAMDPDAAR,YTFVVPEDTR,YEIVVEAR,VHFLPVVISDNGMPSR
P10586-2	PTPRF	Isoform 2 of Receptor-type tyrosine-protein phosphatase F	1	1	2	membrane	cell organization and biogenesis,cellular component movement,metabolic process,regulation of biological process,response to stimulus	catalytic activity,protein binding,receptor activity,signal transducer activity	200	1376	0.08	0.51	6.375	0.17877	1.0717	7	31	7	31	3.5	21.8	TGEGFIDFIGQVHK,VYYTPDSR,HVVDGISR,GYQVTYVR,YANVIAYDHSR,VLAVNSIGR,NVLELSNVVR	FTLTGLKPDTTYDIK,DSLLAHSSDPVEMR,GSSAGGLQHLVSIR,NGVITQYSVAYEAVDGEDR,LVNIMPYELTR,YSAPANLYVR,TDEDVPSGPPR,YANVIAYDHSR,GVEGSDYINASFLDGYR,TSVLLSWEVPDSYK,VGGSMLTPR,VYYTPDSR,DHPPIPITDLADNIER,QFQFTDWPEQGVPK,EHSSWDLVGLEK,AGLGEEFEK,LNYQTPGMR,TAPDLLPHKPLPASAYIEDGR,VTFDPTSSYTLEDLKPDTLYR,TGEGFIDFIGQVHK,FEVIEFDDGAGSVLR,SDMGVGVFTPTIEAR,VLAVNSIGR,TQQGVPAQPADFQAEVESDTR,SGALQIESSEESDQGK,NVLELSNVVR,AYIATQGPLAESTEDFWR…
Q14126	DSG2	Desmoglein-2	1	1	2	cell surface,cytoskeleton,membrane	cell death,cell organization and biogenesis,regulation of biological process,response to stimulus	metal ion binding,protein binding	263	782	0.17	0.52	3.05882	0.39905	1.0535	7	16	7	15	6.7	17.6	VTQEIVTER,LPDFESR,IVAISEDYPR,AWITAPVALR,GNNVEKPLELR,GQIIGNFQAFDEDTGLPAHAR,QAQVQIR	VTQEIVTER,QESTSVLLQQSEK,DMAGAQAAAVALNEEFLR,LEDRDNWISVDSVTSEIK,QAQVQIR,VYAPASTLVDQPYANEGTVVVTER,ILDVNDNIPVVENK,LPDFESR,IVAISEDYPR,GSSSASIVK,GNNVEKPLELR,GQIIGNFQAFDEDTGLPAHAR,VVPSFLPVDQGGSLVGR,NLDFSVIVANK,FLDDLGLK
Q2NLC9	PURA	PurA protein	1	1	2	cytoplasm,nucleus	cell differentiation,metabolic process,regulation of biological process	DNA binding,RNA binding,protein binding,translation regulator activity	75	186	0.2	0.45	2.25	0.33352	1.0535	2	5	2	5	9.6	17	FYLDVK,GPGLGSTQGQTIALPAQGLIEFR	YGVFMR,FFFDVGSNK,RVDIQNK,FYLDVK,GPGLGSTQGQTIALPAQGLIEFR
B4DW34	SMPDL3B	cDNA FLJ56798, highly similar to Acid sphingomyelinase-like phosphodiesterase 3b	1	1	2	membrane	defense response,metabolic process,regulation of biological process,response to stimulus	catalytic activity,metal ion binding	111	278	0.13	0.37	2.84615	0.33352	1.0535	2	5	2	5	4.8	12	LGEAAVLEIVER,IAGDQSTLQR	LGEAAVLEIVER,LPGPSGAGR,IAGDQSTLQR,VFEYDR,AGDMVYIVGHVPPGFFEK
P19474	TRIM21	E3 ubiquitin-protein ligase TRIM21		1	1	cytoplasm,cytosol,nucleus,vacuole	cell organization and biogenesis,defense response,metabolic process,regulation of biological process,response to stimulus	DNA binding,RNA binding,catalytic activity,metal ion binding,protein binding		466		0.68			1.0434	0	10	0	10	0	22.3		LGDTQQSIPGNEER,LQVALGELR,GGGSVCPVCR,DLDITSPELR,NFLVEEEQR,EAWDLGVCR,DHAMVPLEEAAQEYQEK,LAQQSQALQELISELDR,LAQQSQALQELISELDRR,QLQELEKDER
J3KS22		L-xylulose reductase	1	1	2		metabolic process	catalytic activity	81	235	0.14	0.92	6.57143	0.4251	1.0309	2	4	2	4	8	18.3	TQADLDSLVR,GALDMLTK	GTVQALHATGAR,TQADLDSLVR,GALDMLTK,AVIQVSQIVAR
A0A024R321	FLNB	filamin B, beta (actin binding protein 278), isoform CRA_a		1	1	cytoplasm,cytoskeleton,cytosol,membrane	cell differentiation,cell organization and biogenesis,regulation of biological process,response to stimulus	RNA binding,protein binding		1872		0.56			1.0257	0	42	0	42	0	20.7		VLQSFTVDSSK,LPNNHIGISFIPR,NTVELLVEDK,YGGPNHIVGSPFK,LVSPGSANETSSILVESVTR,LDVTILSPSR,IFAQDGEGQR,TYSVEYLPK,DAGEGLLAVQITDQEGKPK,VVPCLVTPVTGR,VVASGPGLEHGK,SPFEVQVGPEAGMQK,EAGAGGLSIAVEGPSK,VQAQGPGLK,YTPTQQGNMQVLVTYGGDPIPK,YGGELVPHFPAR,VLPTYDASK,AYGPGLEK,AEVSIQNNK,YVPPAAGR,IAGPGLGSGVR,AWGPGLHGGIVGR,DLDIIDNYDYSHTVK,GAGIGGLGITVEGPSESK,AHGPGLEGGLVGKPAEFTIDTK,IKVFGPGIEGK,EAFTNKPNVFTVVTR,TGEEVGFVVDAK,YAPTEVG…
P62745	RHOB	Rho-related GTP-binding protein RhoB		1	1	cytosol,endosome,membrane,nucleus	cell death,cell differentiation,development,regulation of biological process,response to stimulus,transport	catalytic activity,nucleotide binding,protein binding		127		0.74			0.99526	0	3	0	3	0	17.3		TCLLIVFSK,QVELALWDTAGQEDYDR,EVFETATR
Q5QPP1	GALE	UDP-glucose 4-epimerase		1	1	cytosol	metabolic process	catalytic activity,protein binding		123		0.34			0.99526	0	3	0	3	0	15.9		VQELTGR,AVGESVQKPLDYYR,GGGSLPESLR
A2NUT2		Lambda-chain (AA -20 to 215)		1	1			protein binding		101		0.28			0.99526	0	3	0	3	0	14		LTVLGQPK,AGVETTTPSK,SYSCQVTHEGSTVEK
Q15382	RHEB	GTP-binding protein rheb	1	1	2	Golgi,cytoplasm,cytosol,endoplasmic reticulum,membrane,spliceosomal complex	cell communication,metabolic process,regulation of biological process,response to stimulus	catalytic activity,metal ion binding,nucleotide binding,protein binding	106	190	0.35	0.83	2.37143	0.58489	0.99526	2	4	2	4	9.2	13.5	IILEAEK,ENQTAVDVFR	IILEAEK,ENQTAVDVFR,IAILGYR,RIILEAEK
B4E1R7	CAPN2	cDNA FLJ58224, highly similar to Calpain-2 catalytic subunit		1	1	Golgi,chromosome,cytoplasm,cytoskeleton,cytosol,endoplasmic reticulum,membrane,nucleus,vacuole	cell organization and biogenesis,metabolic process,regulation of biological process,response to stimulus	catalytic activity,metal ion binding,protein binding		361		0.52			0.97832	0	8	0	8	0	13.3		SGTMNSYEMR,ELGPYSSK,SDGFSIETCK,NFFLTNR,NPWGEVEWTGR,EFYILWTK,SDTFINLR,ALEEAGFK
L0R5D5	TMEM70	alternative protein TMEM70		1	1	membrane,mitochondrion	cell organization and biogenesis			58		0.26			0.9307	0	2	0	2	0	20.3		LYHEATTDTYK,SLLVNPVLFPNR
A0A096LNV3		E3 ubiquitin-protein ligase RNF114	1	1	2	cytosol,membrane		metal ion binding,protein binding	51	120	0.15	0.54	3.6	0.17877	0.9307	1	4	1	4	4.2	20.2	SALAPGVR	YTFPCPYCPEK,SALAPGVR,DASLQPR,NFDQEGLVEHCK
H0YLA2		Signal recognition particle 14 kDa protein	1	1	2		cell organization and biogenesis,transport	RNA binding	91	106	0.26	0.58	2.23077	0.3895	0.9307	1	2	1	2	12.1	20	VLLESEQFLTELTR	VLLESEQFLTELTR,KISTVVSSK
Q5SYZ4	CRABP2	Cellular retinoic acid-binding protein 2		1	1	cytoplasm,cytosol,endoplasmic reticulum,nucleus	metabolic process,regulation of biological process,response to stimulus,transport	protein binding,transporter activity		69		0.89			0.9307	0	2	0	2	0	18.2		TTEINFK,PNFSGNWK
H0YEZ5		Leucine-rich repeat and IQ domain-containing protein 1		1	1					56		0.19			0.9307	0	2	0	2	0	10.4		ILSEIEK,QFQEEEEK
B2R6C4	REEP5	receptor expression-enhancing protein	1	1	2	membrane		protein binding	94	160	0.34	0.8	2.35294	0.9307	0.9307	3	3	3	3	11.3	10.2	HESQMDSVVK,KATVNLLGEEK,ATVNLLGEEK	KATVNLLGEEK,ATVNLLGEEK,ETADAITK
A0A5E4		Uncharacterized protein		1	1			protein binding		124		0.29			0.87382	0	3	0	3	0	14		AGVETTTPSK,VTVLGQPK,SYSCQVTHEGSTVEK
O75144	LOC102723996,ICOSLG	ICOS ligand		1	1	membrane	defense response,regulation of biological process,response to stimulus	protein binding		137		0.32			0.87382	0	3	0	3	0	10.2		ITENPVSTGEK,GLYDVVSVLR,ALMSPAGMLR
Q6EMK4	VASN	vasorin		1	1	cell surface,extracellular,membrane,mitochondrion	regulation of biological process,response to stimulus	protein binding		119		0.14			0.84785	0	4	0	4	0	7.8		LAGLGLQQLDEGLFSR,YLQGSSVQLR,ESHVTLASPEETR,NLHDLDVSDNQLER
Q9UEI6	PVRL2,NECTIN2	Polio virus related protein 2, alpha isoform	1	1	2	cell surface,membrane	cell organization and biogenesis,regulation of biological process,response to stimulus	protein binding,receptor activity,signal transducer activity	52	173	0.14	0.39	2.78571	0.27427	0.83298	2	5	2	5	3.5	12.9	VQVLPEVR,FTLVPSGR	TDATLSCDVR,VIAKPKNQAEAQK,VEHESFEEPALIPVTLSVR,VQVLPEVR,FTLVPSGR
F5GXJ9		CD166 antigen	1	1	2	membrane		protein binding	77	295	0.05	0.31	6.2	0.1053	0.82335	1	6	1	6	2	13.3	SSNTYTLTDVR	YEKPDGSPVFIAFR,SVQYDDVPEYK,KTDPSGLSK,ALFLETEQLK,SSNTYTLTDVR,QIGDALPVSCTISASR
Q96NY8	PVRL4,NECTIN4	Nectin-4		1	1	extracellular,membrane	cell organization and biogenesis	protein binding,receptor activity		357		0.49			0.8166	0	7	0	7	0	16.6		SAAVTSEFHLVPSR,VDAGEGAQELALLHSK,SYSTLTTVR,NPLDGSVLLR,GDSGEQVGQVAWAR,SQPEESVGLR,GLEDQNLWHIGR
A0A087X2D0		Serine/arginine-rich-splicing factor 3		1	1			nucleotide binding		60		0.76			0.77828	0	2	0	2	0	24.2		AFGYYGPLR,NPPGFAFVEFEDPR
A0A087X2D2		regulation of nuclear pre-mRNA domain-containing protein 1B		1	1					84		1.2			0.77828	0	2	0	2	0	23.8		VKEAAER,LAAELEDR
P12273	PIP	Prolactin-inducible protein	1	1	2	extracellular,membrane,nucleus	metabolic process,regulation of biological process,response to stimulus,transport	catalytic activity,protein binding	43	146	0.2	0.73	3.65	0.21153	0.77828	1	3	1	3	6.8	21.2	FYTIEILKVE	YTACLCDDNPK,FYTIEILK,TVQIAAVVDVIR
A0A087WUL2		proteasome subunit beta type-3		1	1		metabolic process	catalytic activity		54		0.45			0.77828	0	2	0	2	0	20.6		FGIQAQMVTTDFQK,FGPYYTEPVIAGLDPK
A6NFX8		ADP-sugar pyrophosphatase	1	1	2			catalytic activity	61	81	0.13	0.43	3.30769	0.4678	0.77828	2	3	2	3	9.4	14.2	QYIISEELISEGK,VYSYALALK	LDALVAEEHLTVDAR,TTYMDPTGK,VYSYALALK
A0A087WVM7		Ribosomal RNA small subunit methyltransferase Nep1		1	1		metabolic process	catalytic activity		60		0.44			0.77828	0	2	0	2	0	12.7		VSVEYTEK,NVLIEVNPQTR
Q9NX20	MRPL16	39S ribosomal protein L16, mitochondrial		1	1	membrane,mitochondrion,ribosome	cell organization and biogenesis,metabolic process	RNA binding,structural molecule activity		142		0.39			0.77828	0	3	0	3	0	12.3		IATANMLGIR,NNQNPWTFER,GAIDHYVTPVK
Q59EH3	ACP1	acid phosphatase 1 isoform c variant		1	1	cytoplasm	metabolic process	catalytic activity,protein binding		130		0.38			0.77828	0	2	0	2	0	12.1		SPIAEAVFR,IELLGSYDPQK
A0PJ79	MRPL1	MRPL1 protein	1	1	2	membrane,mitochondrion	cell organization and biogenesis,metabolic process	RNA binding,protein binding,structural molecule activity	71	147	0.1	0.32	3.2	0.33352	0.77828	2	4	2	4	5.6	11.9	FQILDFTSPK,QIYEVEK	FQILDFTSPK,VAVFTENASEVK,IDPLLPK,ENFLQTK
M0QXZ6		glia maturation factor gamma		1	1		regulation of biological process	protein binding		47		1.36			0.77828	0	2	0	1	0	11.8		GLQLQVR
A0A087X1K9	LYPLA1	Acyl-protein thioesterase 1	1	1	2	cytoplasm,cytosol,mitochondrion	metabolic process,regulation of biological process	catalytic activity	36	69	0.19	0.41	2.15789	0.33352	0.77828	1	2	1	2	4.8	11.4	ALIDQEVK	ALIDQEVK,TLVNPANVTFK
F8VY02	ERP29	Endoplasmic reticulum resident protein 29		1	1	cell surface,endoplasmic reticulum,membrane,organelle lumen	metabolic process,regulation of biological process,transport	catalytic activity,protein binding		106		0.41			0.77828	0	2	0	2	0	10.6		WAEQYLK,QGQDNLSSVK
O60487	MPZL2	Myelin protein zero-like protein 2		1	1	cytoskeleton,membrane		protein binding		106		0.29			0.77828	0	2	0	2	0	10.2		VSWDGNPER,NPPDVDGVIGEIR
Q9UNN8	PROCR	Endothelial protein C receptor		1	1	cell surface,extracellular,membrane	cellular component movement,coagulation,regulation of biological process,response to stimulus	protein binding,receptor activity		144		0.26			0.77828	0	2	0	2	0	9.2		EFLEDTCVQYVQK,TLAFPLTIR
A0A024QZJ7	CCDC6	coiled-coil domain containing 6, isoform CRA_a	1	1	2	cytoskeleton,cytosol	cell organization and biogenesis,metabolic process	protein binding,structural molecule activity	90	165	0.13	0.27	2.07692	0.58489	0.77828	4	5	4	5	9.7	9	SGGIVISPFR,LASLQQENK,EKIDLENTLEQEQEALVNR,QLTLEQLR	SGGIVISPFR,KLENDTISK,LASLQQENK,LEELTNR,QLTLEQLR
P17900	GM2A	Ganglioside GM2 activator		1	1	cytoplasm,extracellular,mitochondrion,organelle lumen,vacuole	metabolic process,regulation of biological process,response to stimulus,transport	catalytic activity,enzyme regulator activity,transporter activity		85		0.16			0.77828	0	2	0	2	0	8.8		IESVLSSSGK,VDLVLEK
A1YVW6	PRNP	Major prion protein		1	1	Golgi,cell surface,cytoplasm,cytosol,endoplasmic reticulum,membrane	cell organization and biogenesis,cellular homeostasis,metabolic process,regulation of biological process,response to stimulus	metal ion binding,protein binding,receptor activity,signal transducer activity		108		0.25			0.77828	0	2	0	2	0	7.9		VVEQMCITQYER,ESQAYYQR
Q9UMS4	PRPF19	Pre-mRNA-processing factor 19		1	1	cytoplasm,cytoskeleton,membrane,nucleus,spliceosomal complex	cell organization and biogenesis,cell proliferation,metabolic process,regulation of biological process,response to stimulus	catalytic activity,metal ion binding,protein binding		126		0.19			0.77828	0	4	0	4	0	7.9		ATVLTTERK,TVPEELVKPEELSK,QQLQTTR,SSEQILATLK
P18084	ITGB5	Integrin beta-5		1	1	cell surface,membrane	cell differentiation,cell organization and biogenesis,regulation of biological process,response to stimulus	protein binding,receptor activity		578		0.53			0.75568	0	12	0	12	0	16		DALHLLVFTTDDVPHIALDGK,TTFQLQVR,HLLPLTDR,YEMASNPLYR,VDSFNEEVR,LGFGSFVDK,DISPFSYTAPR,LGFGSFVDKDISPFSYTAPR,NGCGGEIESPASSFHVLR,DAPEGGFDAVLQAAVCK,EDFGSPR,YQTNPCIGYK
B2R6A3	SLC9A3R1	Na(+)/H(+) exchange regulatory cofactor NHE-RF		1	1	cytoplasm,cytoskeleton,membrane,nucleus	cell differentiation,cell organization and biogenesis,cellular homeostasis,regulation of biological process,response to stimulus,transport	protein binding,structural molecule activity		285		0.63			0.7378	0	6	0	6	0	22.9		LVEPGSPAEK,EALAEAALESPRPALVR,ETDEFFK,LLVVDPETDEQLQK,AGLLAGDR,AQEAPGQAEPPAAAEVQGAGNENEPR
P01008	SERPINC1	Antithrombin-III	1	1	2	extracellular,membrane	coagulation,defense response,regulation of biological process,response to stimulus,transport	enzyme regulator activity,protein binding	52	216	0.06	0.44	7.33333	0.096478	0.7378	1	6	1	6	1.9	10.3	LPGIVAEGR	LQPLDFK,FDTISEK,TSDQIHFFFAK,FSPENTR,RVWELSK,LPGIVAEGR
D6R9I9		ATP-binding cassette sub-family E member 1		1	1			catalytic activity,nucleotide binding		197		0.22			0.7302	0	5	0	5	0	15.4		LCIEVTPQSK,GSELQNYFTK,NVEDLSGGELQR,LKPDEGGEVPVLNVSYKPQK,AIIKPQYVDQIPK
P27797	CALR	Calreticulin	1	1	2	Golgi,cell surface,cytoplasm,cytosol,endoplasmic reticulum,extracellular,membrane,nucleus,organelle lumen	cell differentiation,cell organization and biogenesis,cellular homeostasis,metabolic process,regulation of biological process,response to stimulus,transport	DNA binding,RNA binding,metal ion binding,protein binding	134	260	0.22	0.49	2.22727	0.3895	0.7302	3	5	3	5	7.9	14.8	HEQNIDCGGGYVK,EQFLDGDGWTSR,QIDNPDYK	HEQNIDCGGGYVK,FYALSASFEPFSNK,QIDNPDYK,EQFLDGDGWTSR,IKDPDASKPEDWDER
Q12792-4	TWF1	Isoform 4 of Twinfilin-1		1	1	cytoskeleton,cytosol	cell organization and biogenesis,regulation of biological process	catalytic activity,nucleotide binding,protein binding		160		0.55			0.71907	0	4	0	4	0	21		QLQMDVIR,HQTLQGVAFPISR,YLLSQSSPAPLTAAEEELR,INEVQTDVGVDTK
Q9BYD2	MRPL9	39S ribosomal protein L9, mitochondrial		1	1	membrane,mitochondrion,ribosome	cell organization and biogenesis,metabolic process	RNA binding,protein binding,structural molecule activity		105		0.37			0.71907	0	4	0	4	0	16.8		LPEEPITR,NLGVVVAPHTLK,VPLAGEGR,ENLELILTQSVENVGVR
P10909-2	CLU	Isoform 2 of Clusterin		1	1	Golgi,cell surface,cytoplasm,cytosol,endoplasmic reticulum,extracellular,membrane,mitochondrion,nucleus,organelle lumen	cell organization and biogenesis,cell proliferation,defense response,metabolic process,regulation of biological process,response to stimulus,transport	catalytic activity,protein binding		241		0.24			0.70125	0	6	0	6	0	16.1		VTTVASHTSDSDVPSGVTEVVVK,ASSIIDELFQDR,LFDSDPITVTVPVEVSR,EIQNAVNGVK,ELDESLQVAER,FMETVAEK
Q5VWZ2-2	LYPLAL1	Isoform 2 of Lysophospholipase-like protein 1		1	1	cytoplasm,cytosol	metabolic process	catalytic activity		107		0.46			0.70125	0	3	0	3	0	14.4		ASAVYQALQK,QVLNQDLTFQHIK,IIYPTAPPR
Q6YN16-2	HSDL2	Isoform 2 of Hydroxysteroid dehydrogenase-like protein 2	1	1	2	membrane,mitochondrion	metabolic process	catalytic activity	51	257	0.09	0.53	5.88889	0.11034	0.68761	1	5	1	5	3.7	17.1	LAGCTVFITGASR	DGANIVIAAK,DSLSDDVVK,LAGCTVFITGASR,SGAVEETFR,LLGTIYTAAEEIEAVGGK
D3DQ69	SERBP1	Serpine1 mRNA binding protein 1, isoform CRA_c	1	1	2	cytosol,membrane,nucleus	regulation of biological process	RNA binding,protein binding	60	244	0.14	0.38	2.71429	0.23285	0.68761	2	5	2	5	4.4	12.2	RFEKPLEEK,RPDQQLQGEGK	VEFNIR,RFEKPLEEK,RPDQQLQGEGK,SAAQAAAQTNSNAAGK,EAGGGGVGGPGAK
Q96EY1	DNAJA3	DnaJ homolog subfamily A member 3, mitochondrial		1	1	cytoplasm,cytosol,membrane,mitochondrion,nucleus,organelle lumen	cell death,cell differentiation,cell organization and biogenesis,metabolic process,regulation of biological process,response to stimulus	enzyme regulator activity,metal ion binding,nucleotide binding,protein binding		128		0.27			0.68761	0	5	0	5	0	12.2		EAGEDEEGFLSK,EIFITFR,VMIPVPAGVEDGQTVR,GSIIISPCVVCR,GGPTVDPEELFR
B4DSF0		cDNA FLJ56734, moderately similar to Sepiapterin reductase	1	1	2				40	95	0.26	0.59	2.26923	0.29155	0.6681	1	2	1	2	8.1	16.2	QLEAELGAER	QLEAELGAER,AVCLLTGASR
C9JP48		Serine/threonine-protein phosphatase		1	1		metabolic process	catalytic activity,metal ion binding		56		0.47			0.6681	0	2	0	2	0	14.4		IVQMTEAEVR,GNHECASINR
P61224	RAP1B	Ras-related protein Rap-1b		1	1	cytoplasm,cytosol,membrane	cell organization and biogenesis,cell proliferation,regulation of biological process,response to stimulus,transport	catalytic activity,nucleotide binding,protein binding		117		0.34			0.6681	0	2	0	2	0	11.4		LVVLGSGGVGK,YDPTIEDSYR
B4DQE2	LOC100289283	cDNA FLJ59125		1	1					47					0.6681	0	2	0	2	0	10.5		QGMGLQR,GQEELGR
Q10589	BST2	bone marrow stromal antigen 2		1	1	Golgi,cell surface,cytoplasm,cytosol,endosome,membrane	cell communication,cell proliferation,cellular component movement,defense response,development,regulation of biological process,response to stimulus,transport	RNA binding,enzyme regulator activity,protein binding,signal transducer activity,transporter activity		76		0.36			0.6681	0	2	0	2	0	10		LQDASAEVER,ENQVLSVR
I3L0E3	MRPS17,ZNF713	hCG1984214, isoform CRA_a		1	1	membrane,nucleus,ribosome	cell organization and biogenesis,metabolic process,regulation of biological process	DNA binding,RNA binding,metal ion binding,structural molecule activity		87		0.27			0.6681	0	2	0	2	0	8		HELAEIVFK,LVLDPYLLK
B3KUV8	GALK2	cDNA FLJ40730 fis, clone TKIDN2000464, highly similar to N-acetylgalactosamine kinase		1	1	cytoplasm	metabolic process	catalytic activity,nucleotide binding		60		0.15			0.6681	0	2	0	2	0	7.2		LIEFSPLR,LEEVQAK
H0YAG8		alcohol dehydrogenase class-3		1	1		metabolic process	catalytic activity,metal ion binding		57		0.12			0.6681	0	2	0	2	0	6.8		GLMPDGTSR,IDPLAPLDK
Q9Y6U3-2	SCIN	Isoform 2 of Adseverin		1	1	cytoplasm	cell organization and biogenesis,regulation of biological process,transport	metal ion binding,protein binding		282		0.41			0.65482	0	7	0	7	0	15.5		VLGEKPELPDGGDDDDIIADISNR,NLASITR,SELIVVEEGSEPSELIK,SLGGQAVQIR,GQIIYTWQGANATR,ANQVATGIR,ELYHEEFAR
A0A087WVV2		Ribosome-binding protein 1		1	1	endoplasmic reticulum				516		0.45			0.65482	0	14	0	14	0	14.9		LIEILSEK,LQQENSILR,EQEITAVQAR,TTQEQLAR,GDPVAILK,GNTPATGTTQGK,QSDELALVR,QVLQLQASHR,SVEEEEQVWR,LLATEQEDAAVAK,HLEEIVEK,NTDVAQSPEAPK,KLQEQLEK,HPPAPAEPSSDLASK
Q13841	ACTR1B	Beta-centractin		1	1	cytoplasm,cytoskeleton,cytosol,extracellular,membrane,organelle lumen	transport	nucleotide binding,protein binding		133		0.29			0.63789	0	4	0	4	0	13.6		IWQYVYSK,ISAPQER,LLSEVKK,DQLQTFSEEHPVLLTEAPLNPSK
Q7Z7H5-2	TMED4	Isoform 2 of Transmembrane emp24 domain-containing protein 4		1	1	membrane	regulation of biological process,response to stimulus,transport	signal transducer activity		139		0.47			0.63789	0	3	0	3	0	13.2		QLLDQVEQIQK,MALFAGGK,AGVGAGPLR
Q9NRX2	MRPL17	39S ribosomal protein L17, mitochondrial	1	1	2	membrane,mitochondrion,ribosome	cell organization and biogenesis,metabolic process	protein binding,structural molecule activity	32	129	0.17	0.59	3.47059	0.17877	0.63789	1	3	1	3	4.5	13.1	MGLGPESR	MGLGPESR,LFQVLAPR,MAVIEYK
O00194	RAB27B	ras-related protein rab-27b		1	1	Golgi,membrane	regulation of biological process,response to stimulus,transport	catalytic activity,nucleotide binding,protein binding		90		0.29			0.63789	0	3	0	3	0	12.8		ADLPDQR,LLALGDSGVGK,FITTVGIDFR
Q75LP3	SUMF2	Putative uncharacterized protein DKFZP566I1024		1	1	endoplasmic reticulum,organelle lumen	metabolic process	metal ion binding		78		0.1			0.63789	0	3	0	3	0	10.9		EATVKPFAIDIFPVTNK,VQLQGGR,SVLWWLPVEK
B4DQI7	NIPSNAP1	cDNA FLJ58042, highly similar to Protein NipSnap1	1	1	2	membrane,mitochondrion		protein binding	55	122	0.11	0.35	3.18182	0.3895	0.63789	2	4	2	3	7.9	8.7	SQMLLSR,GWDENVYYTVPLVR	SQMLLSR,ETSNLYK,NNKEYLEFR
B4DDX2	KHDRBS1	cDNA FLJ54590, highly similar to KH domain-containing, RNA-binding, signaltransduction-associated protein 1		1	1	cytosol,membrane,nucleus	cell proliferation,metabolic process,regulation of biological process,response to stimulus	DNA binding,RNA binding,protein binding		105		0.23			0.63789	0	3	0	3	0	7.8		YLPELMAEK,KDDEENYLDLFSHK,ILGPQGNTIK
B2RAR6	EEF1D	cDNA, FLJ95068, highly similar to Homo sapiens eukaryotic translation elongation factor 1 delta (guanine nucleotide exchange protein) (EEF1D), transcript variant 1, mRNA		1	1	cytoplasm,cytosol,endoplasmic reticulum,nucleus	metabolic process,regulation of biological process,response to stimulus	DNA binding,RNA binding,protein binding,signal transducer activity		437		0.37			0.62975	0	7	0	7	0	14.6		QENGASVILR,SIQLDGLVWGASK,FEEHVQSVDIAAFNK,SLAGSSGPGASSGTSGDHGELVVR,GVVQELQQAISK,IASLEVENQSLR,LVPVGYGIR
P78527	PRKDC	DNA-dependent protein kinase catalytic subunit		1	1	cytosol,membrane,nucleus	cell death,cell differentiation,cell organization and biogenesis,cell proliferation,metabolic process,regulation of biological process,response to stimulus	DNA binding,RNA binding,catalytic activity,nucleotide binding,protein binding		1915		0.33			0.62725	0	48	0	48	0	11.4		EQQHVMEELFQSSFR,NLSSNEAISLEEIR,LVINTEEVFRPYAK,IGELFSK,EIFNFVLK,VVQMLGSLGGQINK,LLSITVR,FVPLLPGNR,TETVTSFR,SIGEYDVLR,GIFTSEIGTK,SYVAWDR,LLALNSLYSPK,LSLMYAR,AALSALESFLK,LPSNTLDR,ILDVMYSR,LGASLAFNNIYR,MKQDAQVVLYR,LLQDFNR,LLPAELPAK,LAAVVSACK,HNLEIIK,LLEEALLR,ATQQQHDFTLTQTADGR,SLGPPQGEEDSVPR,LMDEFK,DLLLNTMSQEEK,DYVAVAR,LLQIIER,LQETLSAADR,DYVDLFR,NELEIPGQYDGR,VTELALTASDR,HGDLPDIQIK,LNESTFDTQITK,HSSLITPL…
Q92626	PXDN	peroxidasin homolog		1	1	endoplasmic reticulum,extracellular	cell organization and biogenesis,metabolic process,regulation of biological process,response to stimulus	antioxidant activity,catalytic activity,metal ion binding,protein binding,structural molecule activity		562		0.26			0.62655	0	15	0	15	0	9.5		GGSQLSVDR,EIQPGAFR,GQFNAFSYHFR,IPSGAFEDLENLK,NEIQSIDR,AFFSPFR,DGVQVTESGK,TQEVTLR,YLYLYK,DPYTVEQAR,VPSQLLNTELTER,SPNDLLALFR,IVNEGGIDPLLR,IATELLK,SVYENGFNTPR
A0A087X1Z3		proteasome activator complex subunit 2		1	1					140		0.38			0.62378	0	4	0	4	0	14.5		CGFLPGNEK,DEAAYGELR,TKVEAFQTTISK,AMVLDLR
Q13283	G3BP1	Ras GTPase-activating protein-binding protein 1	1	1	2	cytoplasm,cytosol,membrane,nucleus	metabolic process,regulation of biological process,response to stimulus,transport	DNA binding,RNA binding,catalytic activity,nucleotide binding,protein binding	92	186	0.13	0.36	2.76923	0.43845	0.62378	3	4	3	4	6.4	10	FYVHNDIFR,TFSWASVTSK,EAGEQGDIEPR	FYVHNDIFR,TFSWASVTSK,LPNFGFVVFDDSEPVQK,EAGEQGDIEPR
O60664-3	PLIN3	Isoform 3 of Perilipin-3	1	1	2	Golgi,cytoplasm,cytosol,endosome,membrane	transport	protein binding	103	165	0.15	0.4	2.66667	0.33352	0.6156	3	5	3	5	8.3	16.6	TLTAAAVSGAQPILSK,VSGAQEMVSSAK,QEQSYFVR	SEEWADNHLPLTDAELAR,QEQSYFVR,IATSLDGFDVASVQQQR,LEPQIASASEYAHR,DTVATQLSEAVDATR
B2RAK1	LNPEP	aminopeptidase		1	1	cytosol,extracellular,membrane,organelle lumen	cell communication,cell organization and biogenesis,metabolic process,regulation of biological process,response to stimulus	catalytic activity,metal ion binding,protein binding		454		0.28			0.6156	0	10	0	10	0	10.1		GFPLVTVQK,ELSSYEDFLDAR,LPTAVVPLR,LFPWAQIR,YISIGSEAEK,GSSLLLMLK,INPYVLSDKDR,IIRDEQYTALSNMPK,ILEALASSEDVR,YQSVSLLDK
P13798	APEH	Acylamino-acid-releasing enzyme	1	1	2	cytoplasm,cytosol,extracellular,membrane	cell organization and biogenesis,metabolic process,transport	RNA binding,catalytic activity,protein binding	109	264	0.08	0.26	3.25	0.1721	0.61026	2	6	2	6	2.8	7.1	SALYYVDLIGGK,VGFLPSAGK	LSPDQCR,SALYYVDLIGGK,VGFLPSAGK,SFNLSALEK,QGMEYYR,QFLEVWEK
Q9P1F0		PRO2049		1	1					43		0.37			0.58489	0	2	0	2	0	19.7		LGTGLSIQIR,FGRLNW
H0Y6E7		RNA-binding motif protein, X chromosome		1	1			nucleotide binding		206		0.49			0.58489	0	5	0	5	0	18.1		VEQATKPSFESGR,GNMVEADRPGK,LFIGGLNTETNEK,DSYGGPPR,ALEAVFGK
A0A087WUV8		Basigin		1	1	membrane		protein binding		80		0.35			0.58489	0	2	0	2	0	14.8		RKPEDVLDDDDAGSAPLK,GSDQAIITLR
B4DH47	NEBL	cDNA FLJ53769, highly similar to Homo sapiens nebulette (NEBL), transcript variant 2, mRNA		1	1		cell organization and biogenesis	protein binding,structural molecule activity		95		0.26			0.58489	0	4	0	4	0	14.8		KNTQVVSDAAYK,TQEQISNVK,NTQVVSDAAYK,QSFTTVADTPENLR
B8XPJ7	COMT	Soluble catechol-O-methyltransferase		1	1	cytosol,membrane,mitochondrion	cell communication,metabolic process,regulation of biological process,response to stimulus	catalytic activity,metal ion binding,protein binding		64		0.29			0.58489	0	2	0	2	0	14.4		GSSCFECTHYQSFLEYR,YLPDTLLLEECGLLR
P12081-2	HARS	Isoform 2 of Histidine--tRNA ligase, cytoplasmic		1	1	cytoplasm,cytosol,mitochondrion	cell organization and biogenesis,metabolic process	catalytic activity,nucleotide binding		291		0.43			0.58489	0	6	0	6	0	12.3		AALEELVK,YDLTVPFAR,QALEGLGDLK,DQGGELLSLR,REDLVEEIK,ASAELIEEEVAK
A8K5D5	MRPL19	cDNA FLJ76832, highly similar to Homo sapiens mitochondrial ribosomal protein L19 (MRPL19), mRNA		1	1	membrane,mitochondrion,nucleus,ribosome	cell organization and biogenesis,metabolic process	structural molecule activity		126		0.21			0.58489	0	4	0	4	0	11.4		IEAAIWK,FLSPEFIPR,LDDSLLYLR,VPVNELK
Q9BS26	ERP44	Endoplasmic reticulum resident protein 44	1	1	2	cell surface,endoplasmic reticulum,extracellular,membrane,organelle lumen	cellular homeostasis,metabolic process,regulation of biological process,response to stimulus,transport	catalytic activity,metal ion binding,protein binding	77	151	0.14	0.31	2.21429	0.25893	0.58489	2	4	2	4	7.3	11	ALADYIR,VANILHDDCAFLSAFGDVSKPER	LAPSEYR,ALADYIR,VANILHDDCAFLSAFGDVSKPER,SDPIQEIR
H0YD97		Pyruvate dehydrogenase protein X component, mitochondrial	1	1	2		metabolic process	catalytic activity	39	107	0.16	0.35	2.1875	0.25893	0.58489	1	2	1	2	5.2	10	GIQEIADSVK	VVDDELATR,GIQEIADSVK
P31689-2	DNAJA1	Isoform 2 of DnaJ homolog subfamily A member 1		1	1	cytoskeleton,cytosol,membrane,mitochondrion,nucleus	cellular component movement,metabolic process,regulation of biological process,response to stimulus,transport	enzyme regulator activity,metal ion binding,nucleotide binding,protein binding		137		0.29			0.58489	0	3	0	3	0	9.3		QISQAYEVLSDAK,YHPDKNPNEGEK,LIIEFK
A0A087X2H6		Calcium uniporter protein, mitochondrial		1	1					69		0.22			0.58489	0	2	0	2	0	6.7		VAIYSPDGVR,QEYVYPEAR
P09960	LTA4H	leukotriene A-4 hydrolase		1	1	cytoplasm,cytosol,extracellular,membrane,nucleus	metabolic process,transport	RNA binding,catalytic activity,metal ion binding,protein binding		350		0.38			0.54593	0	7	0	7	0	12.9		VVINGQEVK,TFGETHPFTK,TLTGTAALTVQSQEDNLR,SLVLDTK,LTYTAEVSVPK,WEDAIPLALK,GSPMEISLPIALSK
Q5T653	MRPL2	39S ribosomal protein L2, mitochondrial		1	1	membrane,mitochondrion,ribosome	cell organization and biogenesis,metabolic process	RNA binding,catalytic activity,structural molecule activity		133		0.21			0.53993	0	3	0	3	0	14		MIDFLR,EGDAHPLGALPVGTLINNVESEPGR,SADIALVAGGSR
Q13907-2	IDI1	Isoform 2 of Isopentenyl-diphosphate Delta-isomerase 1		1	1	cytosol	metabolic process	catalytic activity,metal ion binding		125		0.47			0.53993	0	4	0	3	0	10.5		LLLQQR,AFSVFLFNTENK,NVTLNPDPNEIK
Q02750	MAP2K1	Dual specificity mitogen-activated protein kinase kinase 1		1	1	Golgi,cytoplasm,cytoskeleton,cytosol,endoplasmic reticulum,endosome,membrane,mitochondrion,nucleus	cell differentiation,cell proliferation,cellular component movement,metabolic process,regulation of biological process,response to stimulus	catalytic activity,enzyme regulator activity,nucleotide binding,protein binding,signal transducer activity		124		0.16			0.53993	0	4	0	4	0	8.9		ISELGAGNGGVVFK,QKVGELK,IPEQILGK,VGELKDDDFEK
A0A024R798	SLC44A2	choline transporter-like protein 2 isoform 2	1	1	2	membrane	metabolic process,regulation of biological process,response to stimulus,transport	signal transducer activity,transporter activity	31	194	0.04	0.17	4.25	0.074608	0.53993	1	6	1	6	1.1	7.8	VIYPTDSR	NAFFLLMR,YLTYLNAR,VIYPTDSR,DFEYYK,DGDCPAVLIPSKPLAR,KANGVLEAR
Q969N2-5	PIGT	Isoform 5 of GPI transamidase component PIG-T		1	1	membrane	cell death,cell differentiation,metabolic process	catalytic activity,protein binding		186		0.31			0.53174	0	5	0	5	0	8.4		VSIQFER,GELSTLLYNTHPYR,ALGQLISK,WDSELQR,AGLSVLLK
C9J8H1		V-type proton ATPase subunit E 1		1	1		transport	catalytic activity,transporter activity		100		0.3			0.51991	0	2	0	2	0	10.8		VSNTLESR,ARDDLITDLLNEAK
E5RHT6		ADP-ribosylation factor GTPase-activating protein 1		1	1			enzyme regulator activity		55		0.27			0.51991	0	2	0	2	0	10.2		DKVVALAEGR,IFDDVSSGVSQLASK
B7Z553	VTN	cDNA FLJ51266, highly similar to Vitronectin		1	1	endoplasmic reticulum,extracellular,organelle lumen	cell differentiation,cell organization and biogenesis,regulation of biological process,response to stimulus,transport	metal ion binding,protein binding,receptor activity		99		0.3			0.51991	0	2	0	2	0	9.8		GSQYWR,DVWGIEGPIDAAFTR
B4DDQ8	PGM1	cDNA FLJ50439, highly similar to Phosphoglucomutase-1		1	1	cytoplasm,cytoskeleton,cytosol,extracellular	metabolic process,transport	catalytic activity,metal ion binding,protein binding		130		0.27			0.51991	0	4	0	4	0	9.5		SIFDFSALK,LIFTDGSR,VSQLQER,IALYETPTGWK
Q5HYI8	RABL3	Rab-like protein 3		1	1		regulation of biological process,response to stimulus	nucleotide binding		82		0.27			0.51991	0	2	0	2	0	8		WSLEALNR,VLVLGDSGVGK
Q6LEU8	SPINT2	SPINT2 protein	1	1	2	cytoplasm,extracellular,membrane	cell organization and biogenesis,cellular component movement,regulation of biological process,response to stimulus	enzyme regulator activity	30	57	0.11	0.24	2.18182	0.23285	0.51991	1	2	1	2	4.7	7.5	NAADSSVPSAPR	WYFDVER,NAADSSVPSAPR
A8K3A8	QARS	cDNA FLJ75085, highly similar to Homo sapiens glutaminyl-tRNA synthetase (QARS), mRNA		1	1	cytoplasm,cytosol,organelle lumen	metabolic process	catalytic activity,nucleotide binding,protein binding		370		0.34			0.51356	0	9	0	9	0	11.7		QHLEITGGQVR,LEADLEK,FSEGEATLR,FDDTNPEK,LFTLTALR,AMAVLESLR,SHPLDPIDTVDFER,EAATQAQQTLGSTIDK,DVLNDTAPR
P31944	CASP14	Caspase-14	1	1	2	cytoplasm,cytosol,nucleus	cell death,cell differentiation,metabolic process	catalytic activity,protein binding	34	135	0.12	0.57	4.75	0.14505	0.50131	1	4	1	4	4.5	13.6	KTNPEIQSTLR	FQQAIDSR,TNPEIQSTLR,KTNPEIQSTLR,RDPTAEQFQEELEK
Q5JNW7	PSMB8	Proteasome subunit beta type-8		1	1	cytosol,proteasome	cell differentiation,metabolic process,regulation of biological process,response to stimulus,transport	catalytic activity,protein binding		120		0.4			0.50131	0	3	0	3	0	13.4		FQHGVIAAVDSR,ISVSAASK,VESTDVSDLLHQYR
A0A024R2W4	DAG1	dystroglycan 1 (dystrophin-associated glycoprotein 1), isoform CRA_a	1	1	2	cytoplasm,cytoskeleton,cytosol,extracellular,membrane,organelle lumen	cell organization and biogenesis,cellular component movement,metabolic process,regulation of biological process,response to stimulus,transport	metal ion binding,protein binding,receptor activity,structural molecule activity	97	365	0.07	0.3	4.28571	0.12202	0.49624	2	8	2	8	2.6	12.6	LTLEDQATFIK,ATSITVTGSGSCR	LTLEDQATFIK,ATSITVTGSGSCR,LREQQLVGEK,HEYFMHATDK,FVGDPALVLNDIHK,GGLSAVDAFEIHVHR,HLQFIPVVPPR,GVPIIFADELDDSKPPPSSSMPLILQEEK
Q9Y2T2	AP3M1	ap-3 complex subunit mu-1	1	1	2	Golgi,membrane,vacuole	cellular component movement,transport	protein binding	104	137	0.14	0.31	2.21429	0.35031	0.4925	3	4	3	4	7.6	11.2	ELIKPPTILR,VLTWDVGK,VSSQNLVAIPVYVK	VLTWDVGK,TIEGITVTVHMPK,LLDDVSFHPCIR,VSSQNLVAIPVYVK
A0A0A0MS52	CAMK2G	calcium/calmodulin-dependent protein kinase (CaM kinase) II gamma, isoform CRA_a	1	1	2	cytoplasm,cytosol,membrane	cell differentiation,cell organization and biogenesis,metabolic process,regulation of biological process,response to stimulus,transport	catalytic activity,nucleotide binding,protein binding	56	145	0.05	0.17	3.4	0.22168	0.4925	2	4	2	4	3.8	8.5	FYFENLLSK,LTQYIDGQGRPR	FTDDYQLFEELGK,FYFENLLSK,DLKPENLLLASK,LTQYIDGQGRPR
B1AP13	CD55	Complement decay-accelerating factor		1	1	cell surface,extracellular,membrane	cellular homeostasis,defense response,metabolic process,regulation of biological process,response to stimulus,transport	enzyme regulator activity,protein binding,receptor activity		188		0.29			0.4925	0	4	0	4	0	7.4		WSTAVEFCK,QSVTYACNK,LTCLQNLK,SCEVPTR
P55884	EIF3B	Eukaryotic translation initiation factor 3 subunit B	1	1	2	cytoplasm,cytosol	cell organization and biogenesis,metabolic process,regulation of biological process	RNA binding,nucleotide binding,protein binding,structural molecule activity	92	262	0.04	0.23	5.75	0.30103	0.48398	4	6	4	6	6	8.1	VTLMQLPTR,GYIFLEYASPAHAVDAVK,GIALWGGEK,GTQGVVTNFEIFR	VTLMQLPTR,DQYSVIFESGDR,GIALWGGEK,VNLFTDFDK,GTQGVVTNFEIFR,AQAVSEDAGGNEGR
A0A0B4J2A4	ACAA2	3-ketoacyl-CoA thiolase, mitochondrial		1	1	membrane,mitochondrion,organelle lumen	cell organization and biogenesis,metabolic process,regulation of biological process,response to stimulus	RNA binding,catalytic activity,protein binding		98		0.16			0.4678	0	3	0	3	0	14.2		YALQSQQR,DGTVTAGNASGVADGAGAVIIASEDAVK,TNVNGGAIALGHPLGGSGSR
Q9UF24	NDUFS3	Putative uncharacterized protein DKFZp586K0821	1	1	2	membrane,mitochondrion,organelle lumen	cell organization and biogenesis,metabolic process,regulation of biological process	catalytic activity,protein binding	46	65	0.15	0.32	2.13333	0.21153	0.4678	1	2	1	2	6.8	11.5	VVAEPVELAQEFR	AANWYER,KFDLNSPWEAFPVYR
Q9NX63	CHCHD3	MICOS complex subunit MIC19		1	1	cytoplasm,membrane,mitochondrion,nucleus	cell organization and biogenesis,metabolic process,regulation of biological process	protein binding,structural molecule activity		174		0.43			0.4678	0	3	0	3	0	11.4		AAANEQLTR,SSEFYR,VAEELALEQAK
B4DEA3	RAD23B	cDNA FLJ56531, highly similar to UV excision repair protein RAD23 homolog B	1	1	2	cytosol,nucleus,proteasome	cell organization and biogenesis,metabolic process,regulation of biological process,response to stimulus	DNA binding,protein binding	45	124	0.08	0.25	3.125	0.4678	0.4678	2	3	2	3	3.9	11.1	TLQQQTFK,ASFNNPDR	QEKPAEKPAETPVATSPTATDSTSGDSSR,TLQQQTFK,ASFNNPDR
P51114-2	FXR1	Isoform 2 of Fragile X mental retardation syndrome-related protein 1		1	1	cytoplasm,cytosol,membrane	cell death,cell differentiation,regulation of biological process	RNA binding,protein binding		225		0.23			0.4678	0	5	0	5	0	10.3		KVPGVTAIELDEDTGTFR,MAELTVEVR,VIQEIVDK,EISEGDEVEVYSR,LQIDEQLR
B4DL19	ANXA1	Annexin		1	1	cell surface,cytoplasm,cytoskeleton,cytosol,endosome,extracellular,membrane,nucleus,vacuole	cell differentiation,cell organization and biogenesis,cellular component movement,defense response,metabolic process,regulation of biological process,response to stimulus,transport	DNA binding,RNA binding,catalytic activity,enzyme regulator activity,metal ion binding,protein binding,structural molecule activity		57		0.37			0.4678	0	2	0	2	0	9.8		SYPQLR,DITSDTSGDFR
Q15126	PMVK	phosphomevalonate kinase		1	1	cytoplasm,cytosol,membrane	metabolic process,response to stimulus	catalytic activity,nucleotide binding		65		0.32			0.4678	0	2	0	2	0	9.8		EAYGAVTQTVR,VVALEQSR
D3DNT9	EPHB3	Eph receptor B3, isoform CRA_a		1	1	cytosol,extracellular,membrane	cell organization and biogenesis,cellular component movement,metabolic process,regulation of biological process,response to stimulus	catalytic activity,nucleotide binding,protein binding,receptor activity,signal transducer activity		304		0.27			0.4678	0	8	0	8	0	8.4		IEEVIGAGEFGEVCR,VDTIAPDESFSR,EVFVAIK,QLGLTER,VSDFGLSR,FSQIVNTLDK,VYIDPFTYEDPNEAVR,YVVQVR
P21281	ATP6V1B2	V-type proton ATPase subunit B, brain isoform		1	1	cytoplasm,cytosol,membrane	cellular homeostasis,metabolic process,regulation of biological process,response to stimulus,transport	catalytic activity,nucleotide binding,protein binding,transporter activity		143		0.25			0.4678	0	4	0	4	0	8.4		EQALAVSR,NFIAQGPYENR,TPVSEDMLGR,QIYPPINVLPSLSR
P30405	PPIF	Peptidyl-prolyl cis-trans isomerase F, mitochondrial	1	1	2	membrane,mitochondrion,organelle lumen	cell death,cell organization and biogenesis,metabolic process,regulation of biological process,response to stimulus	catalytic activity,protein binding	38	100	0.15	0.32	2.13333	0.21153	0.4678	1	3	1	3	3.3	7.2	TDWLDGK	KIESFGSK,IESFGSK,TDWLDGK
Q59FJ0	PSMB2	Proteasome subunit beta type	1	1	2	cytoplasm,cytosol,membrane,nucleus,proteasome	metabolic process,regulation of biological process,response to stimulus,transport	catalytic activity,protein binding	76	45	0.25		0	0.4678	0.4678	2	2	2	2	7.2	6.4	YYTPTISR,VAASNIVQMK	VAASNIVQMK,NVQLYK
O14672	ADAM10	Disintegrin and metalloproteinase domain-containing protein 10		1	1	Golgi,cell surface,cytoplasm,membrane,nucleus	cell communication,cell organization and biogenesis,metabolic process,regulation of biological process,response to stimulus,transport	catalytic activity,metal ion binding,protein binding		231		0.3			0.45265	0	6	0	6	0	8.5		AIDTIYQTTDFSGIR,FPNIGVEK,TITLQPGSPCNDFR,FSLCSIR,LPPPKPLPGTLK,GYCDVFMR
A8K0P2	PPA2	cDNA FLJ76209, highly similar to Homo sapiens inorganic pyrophosphatase 2 (PPA2), transcript variant 2, mRNA		1	1	cytoplasm,organelle lumen	metabolic process	catalytic activity,metal ion binding		140		0.35			0.43845	0	3	0	3	0	12.4		SLVESVSSSPNK,LIAINANDPEASK,YVANIFPYK
Q9BVV7	TIMM21	Mitochondrial import inner membrane translocase subunit TIM21	1	1	2	membrane,mitochondrion	cell organization and biogenesis,transport	protein binding	29	79	0.12	0.39	3.25	0.12884	0.43845	1	3	1	3	3.2	10.8	TIIIEDNR	TIIIEDNR,GGTAVPTSQK,QGTVYAQVK
B3KUJ5	HDAC2	histone deacetylase	1	1	2	cytoplasm,nucleus	cell differentiation,cell organization and biogenesis,coagulation,metabolic process,regulation of biological process,response to stimulus	DNA binding,RNA binding,catalytic activity,protein binding	52	119	0.06	0.2	3.33333	0.27427	0.43845	2	3	2	3	3.9	6.5	LFENLR,SIRPDNMSEYSK	LFENLR,SIRPDNMSEYSK,YGEYFPGTGDLR
A8K6K4	IL1RAP	cDNA FLJ77565, highly similar to Homo sapiens interleukin 1 receptor accessory protein (IL1RAP), transcript variant 1, mRNA		1	1	membrane	cell organization and biogenesis,defense response,metabolic process,regulation of biological process,response to stimulus,transport	protein binding,receptor activity,signal transducer activity		146		0.27			0.43301	0	5	0	5	0	7.5		GVLENEFGYK,AGLENMASR,TQILSIK,VAFPLEVVQK,TVLTVIK
H0YBR5		Eukaryotic translation initiation factor 3 subunit E		1	1	cytoplasm	metabolic process	RNA binding		88		0.36			0.4251	0	2	0	2	0	13.4		NLYSDDIPHALR,QLQAETEPIVK
F8W9U7		Protein CYR61		1	1	extracellular	regulation of biological process	protein binding		179		0.34			0.4251	0	4	0	4	0	10.8		ELGFDASEVELTR,VTNDNPECR,YCGSCVDGR,ILYNPLQGQK
Q8TCC3-2	MRPL30	Isoform 2 of 39S ribosomal protein L30, mitochondrial		1	1					80		0.33			0.4251	0	2	0	2	0	9.9		NIPSVNAK,VFQASPEDHEK
E9PGT1		Translin		1	1		metabolic process	DNA binding,RNA binding		62		0.13			0.4251	0	2	0	2	0	9.8		KVEEVVYDLSIR,VVQSLEQTAR
A0A024R847	GET4	chromosome 7 open reading frame 20, isoform CRA_a		1	1	cytoplasm,cytosol	regulation of biological process,transport	protein binding		46		0.22			0.4251	0	2	0	2	0	9.5		AEVEVADELLENLAK,VFSLMDPNSPER
Q53G72	BCAP31	B-cell receptor-associated protein 31 variant		1	1	cytosol,endoplasmic reticulum,membrane,mitochondrion	cellular homeostasis,regulation of biological process,response to stimulus,transport	protein binding		71		0.12			0.4251	0	2	0	2	0	8.1		LDVGNAEVK,LQAAVDGPMDK
B4DPN0	APOH	cDNA FLJ51265, moderately similar to Beta-2-glycoprotein 1 (Beta-2-glycoprotein I)		1	1	cell surface,extracellular,organelle lumen	metabolic process,regulation of biological process,response to stimulus,transport	enzyme regulator activity,protein binding		80		0.22			0.4251	0	2	0	2	0	5.4		VSFFCK,TDASDVKPC
O43699	SIGLEC6	Sialic acid-binding Ig-like lectin 6		1	1	extracellular,membrane	cell communication	protein binding		77		0.07			0.4251	0	2	0	2	0	3.3		VQPQEPK,DNAAYFFR
Q02487-2	DSC2	Isoform 2B of Desmocollin-2		1	1	cytoskeleton,membrane	cell communication,cell death,regulation of biological process,response to stimulus	metal ion binding,protein binding		165		0.15			0.41747	0	5	0	5	0	5.6		AYDPETR,TSYVTSVEENTVDVEILR,NLFYVER,LGEESIR,GPGVDQEPR
B7Z5Y8	TRIM3	cDNA FLJ56028, highly similar to Tripartite motif-containing protein 3	1	1	2	Golgi,cytoplasm,endosome	metabolic process,transport	catalytic activity,metal ion binding,protein binding	78	227	0.04	0.17	4.25	0.14505	0.403	2	5	2	5	2.8	7.1	VLQSQLDTLR,VYSADGEFLFK	NGTYELVYTAR,WVSIFSPEGK,VLQSQLDTLR,VYSADGEFLFK,LGSAPEVLLVR
H0Y9Z9		Long-chain-fatty-acid--CoA ligase 1		1	1		metabolic process	catalytic activity		55		0.33			0.3895	0	2	0	2	0	18		MLGRANRR,IGFFQGDIR
Q9Y3D6	FIS1	mitochondrial fission 1 protein		1	1	endoplasmic reticulum,membrane,mitochondrion	cell death,cell organization and biogenesis,cellular homeostasis,metabolic process,regulation of biological process,response to stimulus,transport	protein binding		45		0.2			0.3895	0	2	0	2	0	13.8		LIDKAMKK,GLLQTEPQNNQAK
A0A0C4DGH2	RRAS2	Ras family small GTP binding protein TC21		1	1	endoplasmic reticulum,membrane	cell differentiation,regulation of biological process,response to stimulus	catalytic activity,nucleotide binding,protein binding		75		0.3			0.3895	0	2	0	2	0	11.3		QVTQEEGQQLAR,LVVVGGGGVGK
A0A087WWN2		cullin-4A		1	1		metabolic process	protein binding		63		0.37			0.3895	0	2	0	2	0	9.7		AVQSSTSIR,SIFLFLDR
Q8TBT6	CYC1	Putative uncharacterized protein	1	1	2	membrane,mitochondrion,nucleus	metabolic process,response to stimulus,transport	metal ion binding	62	85	0.1	0.2	2	0.17877	0.3895	1	2	1	2	3.8	8.8	GLLSSLDHTSIR	LFDYFPKPYPNSEAAR,GLLSSLDHTSIR
A0A024R866	RPL35	Ribosomal protein L35, isoform CRA_a	1	1	2	cytosol,membrane,ribosome	cell organization and biogenesis,metabolic process,transport	RNA binding,structural molecule activity	36	80	0.19	0.41	2.15789	0.3895	0.3895	1	2	1	2	5.9	8.2	VLTVINQTQK	VLTVINQTQKENLR,VLTVINQTQK
Q6I9U3	M6PR	M6pr protein		1	1	endosome,membrane,vacuole	cell organization and biogenesis,regulation of biological process,response to stimulus,transport	protein binding,receptor activity,signal transducer activity,transporter activity		53		0.11			0.3895	0	2	0	2	0	7.5		HTLADNFNPVSEER,NVPAAYR
P42892-2	ECE1	Isoform A of Endothelin-converting enzyme 1		1	1	endosome,membrane	metabolic process,regulation of biological process	catalytic activity,metal ion binding,protein binding		255		0.25			0.37891	0	6	0	6	0	8.4		TSSFLDQR,DNFQDTLQVVTAHYR,AFEESLSTLK,HTLGENIADNGGLK,AQVYYR,SIATEIILEIK
O94979	SEC31A	Protein transport protein Sec31A	1	1	2	cytoplasm,cytosol,endoplasmic reticulum,membrane	cell organization and biogenesis,response to stimulus,transport	protein binding	67	193		0.08		0.17427	0.37891	3	6	3	6	1.7	4.1	FASSPLR,KNEPIIK,LIWGPYK	FASSPLR,YLELLGYR,KNEPIIK,QVQHILASASPSGR,LIWGPYK,LVTFENVR
X5D2F4	CYFIP1	cytoplasmic FMR1 interacting protein 1 isoform a		1	1	cytosol,extracellular,organelle lumen	cell growth,cell organization and biogenesis,regulation of biological process,response to stimulus,transport	RNA binding,protein binding		313		0.17			0.36887	0	9	0	9	0	7.1		LGTPQQIAIAR,NAFVTGIAR,EANHNVSAPYGR,YAPLHLVPLIER,FISELAR,SFLDDPIWR,YETLLK,TVEVLEPEVTK,YSNSEVVTGSGR
Q59F17	EPHB4	Receptor protein-tyrosine kinase		1	1	cytosol,extracellular,membrane	cellular component movement,metabolic process,regulation of biological process,response to stimulus	catalytic activity,nucleotide binding,protein binding,receptor activity,signal transducer activity		192		0.16			0.36887	0	6	0	6	0	6.9		EDLTYALR,IEEVIGAGEFGEVCR,APSGAVLDYEVK,DLVEPWVVVR,VSDFGLSR,VYIDPFTYEDPNEAVR
Q8N2G8	GHDC	GH3 domain-containing protein		1	1	endoplasmic reticulum,extracellular,membrane,nucleus,organelle lumen	transport			94		0.18			0.36887	0	3	0	3	0	5.8		GEDIGEDLFSEALGR,ALLLDALR,EALEQGPR
Q6S8J3	POTEE	POTE ankyrin domain family member E		1	1			protein binding		538		0.37			0.36338	0	11	0	9	0	9.3		AGFAGDDAPR,RGILTLK,LCYVALDFEQEMATAASSSSLEK,IWHHTFYNELR,QEYDESGPSIVHR,KNDNLLK,SYELPDGQVITIGNER,EKLCYVALDFEQEMATAASSSSLEK,AVFPSIVGRPR
Q96A35	MRPL24	39S ribosomal protein L24, mitochondrial	1	1	2	membrane,mitochondrion,ribosome	cell organization and biogenesis,metabolic process	structural molecule activity	50	100	0.13	0.29	2.23077	0.16591	0.35936	1	2	1	2	4.6	10.6	DTSVEDALER	DTSVEDALER,GTMIPSEAPLLHR
Q9Y2R9	MRPS7	28S ribosomal protein S7, mitochondrial		1	1	membrane,mitochondrion,ribosome	cell organization and biogenesis,metabolic process	RNA binding,structural molecule activity		90		0.25			0.35936	0	2	0	2	0	10.3		FYQVPVPLPDR,YHAASAEEQATIER
G3V124	TMPRSS4	Transmembrane protease serine 4		1	1	membrane	metabolic process,transport	catalytic activity,protein binding,receptor activity		103		0.18			0.35936	0	2	0	2	0	8.9		AVEIGPDQDLDVVEITENSQELR,IPMETFR
B5MC98	PREB	Prolactin regulatory element-binding protein		1	1	membrane,nucleus	cell organization and biogenesis,metabolic process,regulation of biological process,transport	DNA binding,enzyme regulator activity,protein binding		61					0.35936	0	2	0	2	0	8.3		LSASLLHSHDTETR,AHEGEIEDLALGPDGK
F5GXJ1		NADH dehydrogenase [ubiquinone] iron-sulfur protein 7, mitochondrial		1	1		metabolic process	catalytic activity,metal ion binding		70		0.13			0.35936	0	2	0	2	0	7.6		LDDLVNWAR,VYDQMPEPR
E9PMD7		Serine/threonine-protein phosphatase		1	1		metabolic process	catalytic activity,metal ion binding		72		0.24			0.35936	0	2	0	2	0	7.5		LNLDSIIGR,GNHECASINR
Q3KQV9	UAP1L1	UDP-N-acetylhexosamine pyrophosphorylase-like protein 1		1	1	cytosol	metabolic process	catalytic activity		182		0.25			0.35936	0	4	0	4	0	6.7		LGVTYPK,WEEEGFR,LLPAVTFDGK,FWAELAPEPR
O75323-2	GBAS	Isoform 2 of Protein NipSnap homolog 2		1	1	membrane,mitochondrion	metabolic process,regulation of biological process	protein binding		94		0.24			0.35936	0	2	0	2	0	6.4		ETSNLYK,SGPNIYELR
Q9Y5L3-2	ENTPD2	Isoform Short of Ectonucleoside triphosphate diphosphohydrolase 2		1	1	membrane	metabolic process,regulation of biological process,response to stimulus	catalytic activity,nucleotide binding		95		0.13			0.35936	0	2	0	2	0	4.6		VSLSGSSDPHLCR,AFGGVIFQK
B4DGD5	DNAJC11	cDNA FLJ53979, highly similar to DnaJ homolog subfamily C member 11	1	1	2	membrane,mitochondrion		protein binding	43	124		0.2		0.22168	0.35031	2	3	2	3	4.6	5.3	AGFFGTVVEYGAER,LILTEASK	LMQESVR,ESAATDVLQK,LILTEASK
B7Z2V7	STXBP1	cDNA FLJ54602, highly similar to Syntaxin-binding protein 1		1	1	cytoplasm,cytosol,membrane,mitochondrion	cell communication,cell organization and biogenesis,regulation of biological process,transport	RNA binding,protein binding		156		0.22			0.33352	0	4	0	4	0	9.3		SQLLILDR,AIVPILLDANVSTYDK,ISEQTYQLSR,REPLPSLEAVYLITPSEK
A0A024R1F4		hCG2010666, isoform CRA_a		1	1		metabolic process	catalytic activity		124		0.23			0.33352	0	3	0	3	0	6.5		GGLSVAVPGEIR,NIDQAVTAALETR,TAGGWAAASDSR
B3KM97	TECR	cDNA FLJ10554 fis, clone NT2RP2002385, highly similar to Synaptic glycoprotein SC2	1	1	2	cytoplasm,endoplasmic reticulum,membrane,nucleus	metabolic process	catalytic activity,protein binding	36	62	0.09	0.19	2.11111	0.15478	0.33352	1	2	1	2	2.2	6.1	YDFTSSR	LPVGTTATLYFR,YDFTSSR
O96013	PAK4	serine/threonine-protein kinase PAK 4		1	1	Golgi,cytoplasm	cell death,cell growth,cell organization and biogenesis,cell proliferation,cellular component movement,metabolic process,regulation of biological process,response to stimulus	catalytic activity,nucleotide binding,protein binding,signal transducer activity		148		0.16			0.33352	0	3	0	3	0	5.9		FAGHSEAGGGSGDR,ATAAELLK,AALQLVVDPGDPR
B2RAF9	ST14	Suppressor of tumorigenicity 14 protein homolog		1	1	membrane	cell death,cell differentiation,cell organization and biogenesis,metabolic process	catalytic activity,protein binding		251		0.14			0.33352	0	4	0	4	0	5.6		SFDLASCDER,SFVVTSVVAFPTDSK,SQFVVTSNSNK,GDADSVLSLTFR
Q8IZV5	RDH10	Retinol dehydrogenase 10	1	1	2	cytoplasm,endoplasmic reticulum,membrane,nucleus	metabolic process	catalytic activity	30	87	0.09	0.18	2	0.15478	0.33352	1	2	1	2	2.3	4.9	LFALEFAR	ENVYLTAER,LFALEFAR
O00505	KPNA3	Importin subunit alpha-4		1	1	cytoplasm,cytosol,nucleus	cell organization and biogenesis,regulation of biological process,transport	protein binding,transporter activity		52		0.06			0.33352	0	2	0	2	0	3		VQTAALR,NPPIDDLIK
Q59EZ3	IGF2R	Insulin-like growth factor 2 receptor variant		1	1	Golgi,cell surface,cytoplasm,endosome,membrane	cell organization and biogenesis,regulation of biological process,response to stimulus,transport	catalytic activity,protein binding,receptor activity,signal transducer activity,transporter activity		522		0.18			0.33013	0	14	0	14	0	6		SYEECIIESR,FLHQDIDSGQGIR,TSSIIFK,GHQAFDVGQPR,TVEACPVVR,YDLSALVR,HQDEAVVLSYVNGDR,SFSLGDIYFK,TYHSVGDSVLR,VAGLLTQK,ATLITFLCDR,YVDGDLCPDGIR,TTTGDVQVLGLVHTQK,LVLSYVR
Q5TG12	PTPRK	Receptor-type tyrosine-protein phosphatase kappa		1	1	cell surface,membrane	cell organization and biogenesis,cellular component movement,metabolic process,regulation of biological process,response to stimulus	catalytic activity,protein binding,receptor activity,signal transducer activity		444		0.17			0.32763	0	8	0	8	0	6.7		GLNPGTLNILVR,YGNIIAYDHSR,GSGVSNFAQLIVR,SLQGTSFENK,GAPISAYQIVVEELHPHR,IAEIQAR,TDQDLYR,KESEETIIQTDEDVPGPVPVK
A0A087WVP1		Protocadherin Fat 1		1	1	cell surface,membrane		metal ion binding,protein binding		722		0.1			0.32194	0	20	0	20	0	4.5		ILSPLDR,AEHSGTVLYSLVK,IFVTIADNASPK,AVDQGLPR,TGLITTTSR,FSAAGEYDILSIK,STLPTGIQVK,LSFVTPR,LSGVITTK,FTQDVYSAVVK,ITSGNPQGFFSIHPK,IVQQLDFEK,YEVNIGSSAAK,SNAEITYTLLGSGAEK,EYLVTVVAK,GQIFTLEK,LYGSSGISSMAK,ASDWGLPYR,DESFVIDR,VQATDADAGLNR
D6RBJ7		vitamin D-binding protein		1	1	extracellular	transport	transporter activity		115		0.17			0.31113	0	2	0	2	0	8.6		LCDNLSTK,HQPQEFPTYVEPTNDEICEAFR
B3KP89	GNAO1	cDNA FLJ31446 fis, clone NT2NE2000909, highly similar to Guanine nucleotide-binding protein G(o) subunit alpha 1		1	1	membrane	cell organization and biogenesis,metabolic process,regulation of biological process,response to stimulus	catalytic activity,metal ion binding,nucleotide binding,protein binding,signal transducer activity		119		0.17			0.31113	0	2	0	2	0	6.4		TTGIVETHFTFK,LLLLGAGESGK
A0A0C4DG85	ADH7	Alcohol dehydrogenase class 4 mu/sigma chain		1	1	cytosol,extracellular,membrane	metabolic process,regulation of biological process,response to stimulus	catalytic activity,metal ion binding,protein binding		51		0.08			0.31113	0	2	0	2	0	4.2		ILATGICR,LVTEFLAK
K7EJZ9		Microtubule-associated serine/threonine-protein kinase 1		1	1		cell organization and biogenesis,metabolic process,regulation of biological process,response to stimulus	catalytic activity,metal ion binding,nucleotide binding		54		0.07			0.31113	0	2	0	2	0	4.1		NQIQQAFVER,LLQDAYER
F5H8I7		YTH domain family protein 2		1	1			RNA binding		75		0.11			0.31113	0	2	0	2	0	3.6		LGSTEVASNVPK,DTQEVPLEK
Q4KMQ8	CTBP1	C-terminal binding protein 1		1	1	cytoplasm,nucleus	cell differentiation,metabolic process,regulation of biological process	catalytic activity,nucleotide binding,protein binding		70		0.07			0.31113	0	2	0	2	0	3.6		VQSVEQIR,VGQAVALR
Q16531	DDB1	DNA damage-binding protein 1	1	1	2	cytoplasm,nucleus	cell organization and biogenesis,metabolic process,regulation of biological process,response to stimulus	DNA binding,protein binding	68	284	0.05	0.19	3.8	0.092601	0.30432	2	7	2	7	1.5	8.4	QSGESIDIITR,VVEELTR	LEELHVIDVK,QSGESIDIITR,VVEELTR,EMLGGEIIPR,IEVQDTSGGTTALRPSASTQALSSSVSSSK,ETDDTLVLSFVGQTR,ALYYLQIHPQELR
B4DTS6	CD97,ADGRE5	cDNA FLJ54117, highly similar to CD97 antigen		1	1	cell surface,membrane	cell communication,cellular component movement,defense response,regulation of biological process,response to stimulus,transport	metal ion binding,protein binding,receptor activity,signal transducer activity		155		0.12			0.30432	0	3	0	3	0	5.1		QELLCAFWK,YSEFTSTTSGTGHNQTR,TSSAEVTIQNVIK
Q16543	CDC37	Hsp90 co-chaperone Cdc37		1	1	cytoplasm,cytosol	cell division,metabolic process,regulation of biological process,response to stimulus,transport	catalytic activity,enzyme regulator activity,protein binding		55		0.07			0.29155	0	2	0	2	0	6.8		LQAEAQQLR,EGEEAGPGDPLLEAVPK
B3KSC3	PHGDH	cDNA FLJ35987 fis, clone TESTI2014269, highly similar to D-3-phosphoglycerate dehydrogenase	1	1	2	cytosol	cell organization and biogenesis,metabolic process,regulation of biological process	catalytic activity,nucleotide binding	54	62	0.06	0.13	2.16667	0.29155	0.29155	2	2	2	2	4	5.6	GGIVDEGALLR,TLGILGLGR	AGTGVDNVDLEAATR,GTIQVITQGTSLK
Q13641	TPBG	Trophoblast glycoprotein		1	1	cell surface,cytoplasm,endoplasmic reticulum,membrane	regulation of biological process	protein binding		70		0.15			0.29155	0	2	0	2	0	5		DVLAQLPSLR,AGAFEHLPSLR
B3KTI0	NBPF3	cDNA FLJ38283 fis, clone FCBBF3007077		1	1	cytoplasm				62		0.08			0.29155	0	2	0	2	0	4.8		ELTQLR,AEMNILEINKK
Q8TAT6	NPLOC4	Nuclear protein localization protein 4 homolog	1	1	2	cytoplasm,cytosol,endoplasmic reticulum,membrane,nucleus	cell organization and biogenesis,metabolic process,regulation of biological process,response to stimulus,transport	metal ion binding,protein binding	32	73	0.05	0.1	2	0.089023	0.29155	1	3	1	3	0.9	4.6	FLDFWR	VGWIFTDLVSEDTR,VQSPDGVK,FLDFWR
A0A0A0MQU0		WD repeat-containing protein 18		1	1			protein binding		63		0.07			0.29155	0	2	0	2	0	4.4		DLFDFSTR,VATSSLDQTVK
O95470	SGPL1	sphingosine-1-phosphate lyase 1		1	1	endoplasmic reticulum,membrane	cell death,cell differentiation,cellular component movement,metabolic process,regulation of biological process,response to stimulus	catalytic activity,protein binding		79		0.05			0.29155	0	3	0	3	0	4.4		ASGTVYSGEEK,MMEVDVR,VAIQFLK
E7EW20		Unconventional myosin-VI		1	1			catalytic activity,motor activity,nucleotide binding		277		0.19			0.28703	0	8	0	8	0	7.1		NIRDDEGFIIR,IQAEVEAQLAR,MSQSIIVSGESGAGK,EMSEFLSR,LHLSSPDNFR,SSEELLSALQK,QKEEESQQQAVLEQER,ETDKQILQNR
Q9BZE1	MRPL37	39S ribosomal protein L37, mitochondrial		1	1	membrane,mitochondrion,ribosome	cell organization and biogenesis,metabolic process	RNA binding,structural molecule activity		119		0.14			0.2798	0	3	0	3	0	9.6		VVVEPVGPVGFKPETFR,ESLLLQVR,VLEQPVVVQSVGTDGR
B4E290	SLC25A24	cDNA FLJ50039, highly similar to Homo sapiens solute carrier family 25, member 24, transcript variant 1, mRNA	1	1	2	membrane,mitochondrion	regulation of biological process,response to stimulus,transport	metal ion binding,protein binding,transporter activity	50	96	0.06	0.13	2.16667	0.17877	0.2798	2	3	2	3	4.4	6	LLTEEGQK,QLLAGGIAGAVSR	LLTEEGQK,IAPETAVK,QLLAGGIAGAVSR
A0A087WW43		Inter-alpha-trypsin inhibitor heavy chain H3		1	1					132		0.14			0.2798	0	3	0	3	0	4.9		GHVSFKPSLDQQR,EVSFDVELPK,DYIFGNYIER
Q8IXB1-2	DNAJC10	Isoform 2 of DnaJ homolog subfamily C member 10		1	1	endoplasmic reticulum,membrane,organelle lumen	cellular homeostasis,metabolic process,regulation of biological process,response to stimulus	catalytic activity,enzyme regulator activity,protein binding		127		0.12			0.2798	0	3	0	3	0	3.7		AYEVLKDEDLR,ALLPELR,NFQEEQINTR
Q96I51-2	WBSCR16,RCC1L	Isoform 2 of RCC1-like G exchanging factor-like protein		1	1					55		0.08			0.27427	0	2	0	2	0	11.1		GYEYVLEPSPVSLPLDRPQETR,EAAEAEAEVPVVQYVGER
P54920	NAPA	alpha-soluble nsf attachment protein	1	1	2	cytosol,membrane	cell communication,cell differentiation,cell organization and biogenesis,regulation of biological process,transport	protein binding	48	56	0.1	0.21	2.1	0.27427	0.27427	2	2	2	2	7.7	6.7	TIQGDEEDLR,VAGYAALLEQYQK	EAEAMALLAEAER,EYDSISR
A0A087X2D5	MRPL45	39S ribosomal protein L45, mitochondrial	1	1	2	membrane,mitochondrion	cell organization and biogenesis,metabolic process	RNA binding,protein binding	43	75	0.09	0.2	2.22222	0.12884	0.27427	1	2	1	2	2.6	5.5	QTLAIYDR	FTPPIYQPK,QTLAIYDR
Q96MM3	ZFP42	Zinc finger protein 42 homolog		1	1	cytoplasm,nucleus	cell organization and biogenesis,metabolic process,regulation of biological process	DNA binding,metal ion binding		50		0.09			0.27427	0	2	0	2	0	4.8		FIQSNNLK,QLAEFAR
O95274	LYPD3	Ly6/PLAUR domain-containing protein 3		1	1	extracellular,membrane	metabolic process	protein binding		78		0.19			0.27427	0	2	0	2	0	4.6		TYFSPR,GCVQDEFCTR
D3DTC2	LPCAT1	acyltransferase like 2, isoform CRA_a	1	1	2	Golgi,endoplasmic reticulum,membrane	metabolic process,regulation of biological process,transport	catalytic activity,metal ion binding	32	92	0.06	0.12	2	0.12884	0.27427	1	2	1	2	2.4	4.1	LPADTCLLEFAR	TLDTIQLAFK,NPALYASNVR
Q9HCU4	CELSR2	cadherin EGF LAG seven-pass G-type receptor 2		1	1	cytoplasm,membrane	cell organization and biogenesis,development,regulation of biological process,response to stimulus	metal ion binding,protein binding,receptor activity,signal transducer activity		547		0.14			0.27159	0	13	0	13	0	4.4		STITLQLR,EDVTPGAPVLR,VAYQLATR,VGSALLDTANK,ALDKPVTVQFR,QADGVLLQAITR,VGSALLDTANKR,GSFGTAVR,SLLTAISAQR,NLQVDSR,EGHVMLSVEGTGLQASSLR,YVVQVR,VPAHDPDISDSLTYSFER
H0UIA1	ACSS2	Acyl-CoA synthetase short-chain family member 2, isoform CRA_c	1	1	2	cytoplasm,cytosol	metabolic process	catalytic activity,nucleotide binding	52	116	0.04	0.14	3.5	0.082637	0.26896	2	3	2	3	2.2	4.1	FETTYFK,VRSGSGSR	ELADEALQK,FETTYFK,DQDGYYWITGR
Q96GQ5	C16orf58	RUS1 family protein C16orf58	1	1	2	membrane			34	65	0.06	0.13	2.16667	0.12202	0.25893	1	2	1	2	2.3	7.6	GEVLDPTAANR	GEVLDPTAANR,AATHGLMLGALQGDGPLPAELEELR
Q2I0Y7	CSNK2A1	casein kinase 2 alpha isoform		1	1	cytosol,membrane,nucleus	cell death,metabolic process,regulation of biological process,response to stimulus	catalytic activity,nucleotide binding,protein binding		84		0.15			0.25893	0	2	0	2	0	6.7		LIDWGLAEFYHPGQEYNVR,FNDILGR
D6REM6		Matrin-3		1	1			metal ion binding,nucleotide binding		92		0.04			0.25893	0	4	0	4	0	6.4		RTEEGPTLSYGR,GPSLNPVLDYDHGSR,GNLGAGNGNLQGPR,SQAFIEMETR
Q6NTG0	SLC9A3R2	SLC9A3R2 protein		1	1	membrane,nucleus	cell organization and biogenesis	protein binding,structural molecule activity		48		0.08			0.25893	0	2	0	2	0	5.1		IKAVEGQTR,SVDPGSPAAR
B2R959	HNRNPL	cDNA, FLJ94229, highly similar to Homo sapiens heterogeneous nuclear ribonucleoprotein L (HNRPL),mRNA		1	1	cytosol,membrane,nucleus	cell communication,metabolic process,regulation of biological process,response to stimulus	DNA binding,RNA binding,nucleotide binding,protein binding		98		0.05			0.25893	0	2	0	2	0	5.1		SKPGSAMVEMADGYAVDR,SSSGLLEWESK
B4E324	CTSA	cDNA FLJ60397, highly similar to Lysosomal protective protein		1	1	endoplasmic reticulum,extracellular,membrane,organelle lumen,vacuole	metabolic process,regulation of biological process,transport	catalytic activity,enzyme regulator activity		51		0.06			0.25893	0	2	0	2	0	3.7		EFSHIAFLTIK,QYSGYLK
Q9Y3F4-2	STRAP	Isoform 2 of Serine-threonine kinase receptor-associated protein		1	1	cytoplasm,cytosol	cell organization and biogenesis,regulation of biological process	RNA binding,protein binding		70		0.08			0.2452	0	2	0	2	0	4.9		GAVWGATLNK,LWQTVVGK
P27361	MAPK3	mitogen-activated protein kinase 3		1	1	Golgi,cytoplasm,cytoskeleton,cytosol,endosome,membrane,mitochondrion,nucleus	cell death,cell differentiation,cell organization and biogenesis,cellular component movement,metabolic process,regulation of biological process,response to stimulus,transport	catalytic activity,nucleotide binding,protein binding,signal transducer activity		50		0.08			0.2452	0	2	0	2	0	4.7		GQPFDVGPR,APEIMLNSK
P05543	SERPINA7	thyroxine-binding globulin		1	1	extracellular	regulation of biological process,transport	enzyme regulator activity		56		0.07			0.2452	0	2	0	2	0	4		NALALFVLPK,SILFLGK
P00390	GSR	Glutathione reductase, mitochondrial		1	1	cytoplasm,cytosol,mitochondrion,organelle lumen	cellular homeostasis,metabolic process,regulation of biological process,response to stimulus	antioxidant activity,catalytic activity,nucleotide binding		91		0.12			0.2452	0	2	0	2	0	3.6		ALLTPVAIAAGR,YGIENVK
Q9Y653	GPR56,ADGRG1	Adhesion G-protein coupled receptor G1		1	1	extracellular,membrane	cell communication,cell differentiation,cellular component movement,development,regulation of biological process,response to stimulus	protein binding,receptor activity,signal transducer activity		61		0.04			0.2452	0	2	0	2	0	3.4		RPSAAPASQQLQSLESK,DFLLSDK
O00763-2	ACACB	Isoform 2 of Acetyl-CoA carboxylase 2		1	1		metabolic process	catalytic activity,nucleotide binding		491		0.13			0.235	0	11	0	11	0	5.2		DFTVASPAEFVTR,FGAYIVDGLR,RFEDFTR,VLIANNGIAAVK,DCSIQR,HLEPALAFQLELNR,ITSENPDEGFKPSSGTVQELNFR,AIGIGAYLVR,EASFEYLQNEGER,ANAEYIK,FVVMVTPEDLK
P36955	SERPINF1	Pigment epithelium-derived factor		1	1	extracellular	cell proliferation,cellular homeostasis,development,regulation of biological process,response to stimulus	enzyme regulator activity,protein binding		90		0.15			0.23285	0	2	0	2	0	6.4		KTSLEDFYLDEER,LAAAVSNFGYDLYR
B2RDU4	PTCD3	cDNA, FLJ96770	1	1	2	cytosol,membrane,mitochondrion	cell organization and biogenesis,metabolic process,regulation of biological process	RNA binding,protein binding	45	63	0.08	0.16	2	0.11034	0.23285	1	2	1	2	2.4	4.6	SAYESQPIR	SPALQVLR,SAYESQPIR
P47895	ALDH1A3	Aldehyde dehydrogenase family 1 member A3		1	1	cytoplasm,cytosol,membrane,nucleus	cell organization and biogenesis,metabolic process,regulation of biological process,response to stimulus	catalytic activity,nucleotide binding,protein binding		97		0.12			0.23285	0	2	0	2	0	4.1		VFVEEQVYSEFVR,VTLELGGK
Q7Z2K6	ERMP1	Endoplasmic reticulum metallopeptidase 1	1	1	2	endoplasmic reticulum,membrane	metabolic process	catalytic activity,metal ion binding	105	128	0.03	0.1	3.33333	0.14976	0.23285	2	3	2	3	2.4	3.3	DYLEHITSIGPR,AGDNILAVLK	DYLEHITSIGPR,ILTDSIQR,AGDNILAVLK
P01023	A2M	alpha-2-macroglobulin		1	1	cytosol,extracellular,organelle lumen	cell differentiation,cell organization and biogenesis,metabolic process,regulation of biological process,response to stimulus,transport	enzyme regulator activity,protein binding		228		0.1			0.229	0	6	0	6	0	3.8		ATVLNYLPK,LPPNVVEESAR,MVSGFIPLKPTVK,QSSEITR,GEAFTLK,QTVSWAVTPK
A0A087WTE1		Inter-alpha-trypsin inhibitor heavy chain H2		1	1		metabolic process	enzyme regulator activity		218		0.09			0.22713	0	4	0	4	0	4.3		FYNQVSTPLLR,ALYAQAR,FQLVAENR,IQPSGGTNINEALLR
A0A024R6I7	SERPINA1	alpha-1-antitrypsin		1	1	Golgi,endoplasmic reticulum,extracellular,membrane,organelle lumen	cell organization and biogenesis,coagulation,defense response,regulation of biological process,response to stimulus,transport	enzyme regulator activity,protein binding		54		0.15			0.22168	0	2	0	2	0	4.7		LSITGTYDLK,SVLGQLGITK
Q86X55-1	CARM1	Isoform 1 of Histone-arginine methyltransferase CARM1		1	1	cytoplasm,cytosol,nucleus	cell organization and biogenesis,metabolic process,regulation of biological process,response to stimulus	DNA binding,catalytic activity,protein binding		79		0.11			0.22168	0	2	0	2	0	3.7		LLTIGDANGEIQR,GAAVDEYFR
F8VPD4	CAD	CAD protein	1	1	2	cytosol,membrane,nucleus	metabolic process,response to stimulus,transport	catalytic activity,metal ion binding,nucleotide binding,protein binding	162	246	0.04	0.09	2.25	0.13178	0.21905	5	8	5	8	1.8	3.5	SFPFVSK,ELSDLESAR,LGYPVLVR,AMLSTGFK,LSLDDLLQR	SFPFVSK,ELSDLESAR,LGYPVLVR,VLGTPVETIELTEDR,AMLSTGFK,TLGVDLVALATR,LSLDDLLQR,VPQFSFSR
Q08345-5	DDR1	Isoform 4 of Epithelial discoidin domain-containing receptor 1		1	1	membrane	cell growth,cell organization and biogenesis,cellular component movement,metabolic process,regulation of biological process,response to stimulus,transport	catalytic activity,metal ion binding,nucleotide binding,protein binding,receptor activity,signal transducer activity		106		0.06			0.21819	0	3	0	3	0	3.1		AVSVPLGGR,EEEYLQVDLQR,NLYAGDYYR
Q5HY54	FLNA	Filamin-A	1	1	2	cytoplasm,cytoskeleton,cytosol,extracellular,membrane,nucleus	cell organization and biogenesis,cellular component movement,metabolic process,regulation of biological process,response to stimulus,transport	RNA binding,protein binding,signal transducer activity	84	431	0.02	0.11	5.5	0.055008	0.21695	3	11	3	11	1.4	5.9	EATTEFSVDAR,YGGQPVPNFPSK,EAGAGGLAIAVEGPSK	LTVSSLQESGLK,ANLPQSFQVDTSK,AEISFEDR,DAGEGGLSLAIEGPSK,YNEQHVPGSPFTAR,EATTEFSVDAR,YGGDEIPFSPYR,VDVGKDQEFTVK,GLVEPVDVVDNADGTQTVNYVPSR,EAGAGGLAIAVEGPSK,GAGTGGLGLAVEGPSEAK
D3DUJ0	AFG3L2	AFG3 ATPase family gene 3-like 2 (Yeast), isoform CRA_a	1	1	2	membrane,mitochondrion	cell organization and biogenesis,cellular homeostasis,metabolic process,regulation of biological process,response to stimulus,transport	catalytic activity,metal ion binding,nucleotide binding,protein binding	64	163	0.04	0.12	3	0.050211	0.21648	1	4	1	4	1.3	4.7	VGQISFDLPR	VGQISFDLPR,ITTGAQDDLR,VALLLLEK,HFEQAIER
Q9Y490	TLN1	Talin-1	1	1	2	cell surface,cytoplasm,cytoskeleton,cytosol,extracellular,membrane	cell organization and biogenesis,cellular component movement,transport	protein binding,structural molecule activity	72	359	0.05	0.1	2	0.036059	0.21511	3	11	3	11	0.9	4	QFVQSAK,AVGDASKR,AVTQALNR	QFVQSAK,SIAAATSALVK,ILADATAK,AQVVSNLK,VLVEDTK,NLGTALAELR,LAQAAQSSVATITR,TSTPEDFIR,ALGDLISATK,VLVQNAAGSQEK,AVTQALNR
B4DWI8	PSPC1	cDNA FLJ57805, highly similar to Homo sapiens paraspeckle component 1 (PSPC1), transcript variant alpha, mRNA		1	1	cytoplasm,nucleus	metabolic process,regulation of biological process	DNA binding,RNA binding,nucleotide binding,protein binding		51		0.13			0.21153	0	2	0	2	0	5.6		GSQGGNFEGPNKRR,GFVEFAAKPPAR
Q8IVT2	MISP,C19orf21	Mitotic interactor and substrate of PLK1	1	1	2	cytoplasm,cytoskeleton,membrane	cell division,cell organization and biogenesis	protein binding	49	89	0.04	0.09	2.25	0.13646	0.21153	2	3	2	3	2.5	5	AADPAPEVR,DIVQETQR	WAVIQGQAVR,LDAGDADPR,GTPAGTTPGASQAPK
J3KMX3		Alpha-fetoprotein	1	1	2	cytosol,extracellular	transport		36	145	0.05	0.14	2.8	0.06605	0.21153	1	3	1	3	1.2	4	GYQELLEK	GYQELLEK,YIQESQALAK,SCGLFQK
A0A075B6Q2		Formin-binding protein 1-like		1	1		transport	protein binding		50					0.21153	0	2	0	2	0	2.6		IDELNR,QQLNLR
B3KX19	EFTUD2	cDNA FLJ44500 fis, clone UTERU3000828, highly similar to 116 kDa U5 small nuclear ribonucleoprotein component		1	1	cytosol,membrane,spliceosomal complex	metabolic process,response to stimulus	RNA binding,catalytic activity,nucleotide binding,protein binding		148		0.09			0.20679	0	4	0	4	0	5.1		IAVEPVNPSELPK,GGGQIIPTAR,GHVTQDAPIPGSPLYTIK,YDWDLLAAR
A0A0C4DH22	EPB41L1	Band 4.1-like protein 1	1	1	2	cytoplasm,cytoskeleton,cytosol,membrane	cell organization and biogenesis	protein binding,structural molecule activity	53	143	0.03	0.1	3.33333	0.098541	0.20679	2	4	2	4	1.5	4.4	SLSPIIGK,SNFYIK	LVSPEPPPK,SLSPIIGK,SNFYIK,IRPGEYEQFESTIGFK
B4E0H8	ITGA3	cDNA FLJ60385, highly similar to Integrin alpha-3		1	1	cell surface,membrane	cell differentiation,cell organization and biogenesis,cellular component movement,regulation of biological process,response to stimulus	metal ion binding,protein binding		103		0.09			0.20526	0	3	0	3	0	2.7		LELLLMDNLR,YLLLAGAPR,AAFVSEQQQK
Q9UI12	ATP6V1H	V-type proton ATPase subunit H		1	1	cytosol,membrane	cellular homeostasis,regulation of biological process,response to stimulus,transport	catalytic activity,enzyme regulator activity,protein binding,transporter activity		47		0.06			0.20226	0	2	0	2	0	6.4		VIEQLGGK,LLEVSDDPQVLAVAAHDVGEYVR
Q9UHX1-2	PUF60	Isoform 2 of Poly(U)-binding-splicing factor PUF60		1	1		cell death,metabolic process,regulation of biological process	DNA binding,RNA binding,nucleotide binding,protein binding		61		0.12			0.20226	0	2	0	2	0	4		QAFAPFGPIK,QGEEEDAEIIVK
B2RBL3	TYMP	thymidine phosphorylase	1	1	2	cytosol	cell differentiation,metabolic process,response to stimulus	catalytic activity,protein binding	54	78	0.07	0.14	2	0.096478	0.20226	1	2	1	2	2.2	3.7	ALQEALVLSDR	LSEADIR,ALQEALVLSDR
Q09666	AHNAK	Neuroblast differentiation-associated protein AHNAK	1	1	2	cytoplasm,cytoskeleton,cytosol,membrane,nucleus	cell organization and biogenesis,regulation of biological process	RNA binding,protein binding,structural molecule activity	336	832	0.04	0.1	2.5	0.075525	0.19964	9	21	9	21	7.8	13.9	ADLGVSGPK,GDVDVSLPK,ADIDVSGPK,AEGPEVDVNLPK,ADVDISGPK,FSMPGFK,GEGPEVDVNLPK,ADVVVSGPK,VKGDVDVSLPK	ADLGVSGPK,VDVDVPDVNIEGPDAK,GDVDVSLPK,GNVDISAPK,ADVDISGPK,VDINAPDVEVQGK,VKGDVDVSVPK,GPHVDVSGPDIDIEGPEGK,ANVDISAPK,ADVVVSGPK,VKGDVDVSLPK,AEGPEVDVNLPK,VDVEVPDVSLEGPEGK,ADIDVSGPK,FSMPGFK,VDIDAPDVDVHGPDWHLK,FKMPDMNIK,VQTPEVDVK,VKGDMDVSVPK,GEGPEVDVNLPK,VDIEGPDVNIEGPEGK
Q08188	TGM3	Protein-glutamine gamma-glutamyltransferase E		1	1	cytoplasm	cell differentiation,cell organization and biogenesis,metabolic process	catalytic activity,metal ion binding		122		0.13			0.19935	0	3	0	3	0	4.3		DAATDVASR,VITNFNSAHDTDR,ISYAQYEK
P06727	APOA4	Apolipoprotein A-IV		1	1	cell surface,cytosol,endosome,extracellular,organelle lumen	cell organization and biogenesis,defense response,metabolic process,regulation of biological process,response to stimulus,transport	antioxidant activity,catalytic activity,enzyme regulator activity,metal ion binding,protein binding,transporter activity		65		0.15			0.19378	0	2	0	2	0	4.5		ISASAEELR,LAPLAEDVR
P07686	HEXB	Beta-hexosaminidase subunit beta		1	1	extracellular,membrane,organelle lumen,vacuole	cell organization and biogenesis,cellular component movement,cellular homeostasis,metabolic process,regulation of biological process,reproduction,response to stimulus,transport	catalytic activity,protein binding		97		0.11			0.19378	0	2	0	2	0	3.7		LAPGTIVEVWK,VLDIIATINK
Q59GV2	RBM14	RNA binding motif protein 14 variant		1	1	cytoplasm,nucleus	cell organization and biogenesis,metabolic process,regulation of biological process,response to stimulus	RNA binding,nucleotide binding,protein binding		57		0.06			0.19378	0	2	0	2	0	1.6		RINVELSTK,INVELSTK
S4R3V8		Lipolysis-stimulated lipoprotein receptor		1	1	membrane		protein binding		148		0.1			0.18597	0	2	0	2	0	4.3		DTDSSVASEVR,SSSAGGQGSYVPLLR
O75976	CPD	Carboxypeptidase D		1	1	membrane,nucleus	metabolic process	catalytic activity,metal ion binding		177		0.06			0.18448	0	5	0	5	0	3.2		SQEGDSISVIGR,ALIEWIR,GFVLDATDGR,ESLITLIEK,EFETLIK
P42224	STAT1	Signal transducer and activator of transcription 1-alpha/beta		1	1	cytoplasm,cytosol,nucleus	cell death,cell differentiation,cell proliferation,cellular component movement,defense response,metabolic process,regulation of biological process,response to stimulus	DNA binding,protein binding,signal transducer activity		90		0.04			0.17877	0	4	0	4	0	5		VLFDKDVNER,ILENAQR,TELISVSEVHPSR,KLEELEQK
B4E226	HID1	cDNA FLJ57287		1	1	Golgi,cytoplasm,cytosol	response to stimulus,transport	protein binding		51		0.05			0.17877	0	2	0	2	0	2.7		LFEIQR,SQVSEDGTLR
H0YGH5		Acetyl-CoA carboxylase 2		1	1		metabolic process	catalytic activity,nucleotide binding		172		0.14			0.17537	0	5	0	5	0	6.8		RFEDFTR,HLEPALAFQLELNR,SMTVPISITNPDLLR,AIGIGAYLVR,EASFEYLQNEGER
B2RE43	NTN4	cDNA, FLJ96916, highly similar to Homo sapiens netrin 4 (NTN4), mRNA		1	1	extracellular,membrane	cell communication,cellular component movement,regulation of biological process	protein binding		111		0.09			0.1721	0	2	0	2	0	2.8		MGNLALGR,TLYPESWTDR
E9PHM4		Transmembrane protease serine 13		1	1	membrane	metabolic process	catalytic activity,protein binding,receptor activity		46		0.05			0.16591	0	2	0	2	0	3.3		YNSTIQESLHR,NKPGVYTK
O14678	ABCD4	Atp-binding cassette sub-family d member 4		1	1	membrane	metabolic process,transport	catalytic activity,nucleotide binding,transporter activity		45		0.05			0.16591	0	3	0	2	0	2.1		ISQDVER,LLQTQR
E9PC74		Translation initiation factor eIF-2B subunit epsilon		1	1			protein binding		65		0.04			0.16591	0	2	0	2	0	2.1		AWSPVFR,IITSELYR
P29317	EPHA2	Ephrin type-A receptor 2		1	1	cell surface,membrane	cell death,cell differentiation,cell organization and biogenesis,cell proliferation,cellular component movement,defense response,development,metabolic process,regulation of biological process,response to stimulus	catalytic activity,nucleotide binding,protein binding,receptor activity,signal transducer activity		117		0.09			0.16203	0	3	0	3	0	2.4		FADIVSILDK,YEVTYR,VSDFGLSR
A8KAQ3	SORT1	Sortilin		1	1	Golgi,cell surface,cytosol,endosome,membrane	cell differentiation,cell organization and biogenesis,development,regulation of biological process,response to stimulus,transport	protein binding,receptor activity,signal transducer activity		70		0.07			0.16016	0	2	0	2	0	2.2		IYSFGLGGR,ADLGALELWR
D3DVA5	ARHGEF2	rho/rac guanine nucleotide exchange factor (GEF) 2, isoform CRA_a		1	1	Golgi,cytoplasm,cytoskeleton,cytosol	cell division,cell organization and biogenesis,defense response,regulation of biological process,response to stimulus,transport	metal ion binding,protein binding		95					0.15742	0	4	0	4	0	2.9		LQEIYNR,ALVELLR,SPQEEALQR,LLQDAIR
Q9NZN4	EHD2	EH domain-containing protein 2		1	1	cytoplasm,cytoskeleton,cytosol,endosome,membrane,nucleus	cell organization and biogenesis,coagulation,regulation of biological process,transport	catalytic activity,metal ion binding,nucleotide binding,protein binding		46					0.15478	0	2	0	2	0	2.9		LNDLVKR,LLPLEEHYR
B2RDD7	PRMT5	Protein arginine N-methyltransferase 5		1	1	Golgi,cytoplasm,cytosol,nucleus	cell organization and biogenesis,cell proliferation,metabolic process,regulation of biological process	DNA binding,catalytic activity,nucleotide binding,protein binding		52		0.04			0.15478	0	2	0	2	0	2.8		YSQYQQAIYK,EFIQEPAK
Q5VZU9	TPP2	Tripeptidyl-peptidase 2		1	1	cytoplasm,cytosol	metabolic process	catalytic activity,protein binding		219		0.12			0.15223	0	5	0	5	0	5.4		DGEIVGLSGR,HEQISDLER,LSTMETGTGLIR,VPITAVIAAK,DPVQVAAPSDHGVGIEPVFPENTENSEK
Q9NZB2-4	FAM120A	Isoform D of Constitutive coactivator of PPAR-gamma-like protein 1		1	1					101		0.06			0.1514	0	3	0	3	0	3.4		RQELDAFLAQALSPK,GVISTPVIR,QTAQQIVSHVQNK
Q6ISB3-2	GRHL2	Isoform 2 of Grainyhead-like protein 2 homolog		1	1	membrane,nucleus	cell differentiation,cell organization and biogenesis,cell proliferation,metabolic process,regulation of biological process	DNA binding,protein binding		47					0.14976	0	2	0	2	0	3.1		EGGSVLVK,QGEGPMTYLNK
B7Z2W5	RGL1	ral guanine nucleotide dissociation stimulator-like 1, isoform CRA_d		1	1	cytosol	regulation of biological process,response to stimulus			49		0.08			0.14976	0	2	0	2	0	1.9		IWEVLK,FANLDSSVK
Q5R3F8	ELFN2	Protein phosphatase 1 regulatory subunit 29		1	1	membrane	regulation of biological process	enzyme regulator activity,protein binding		56		0.07			0.14976	0	2	0	2	0	1.7		GNYIEVR,EIVTLDK
P01024	C3	Complement C3		1	1	extracellular,membrane,organelle lumen	defense response,metabolic process,regulation of biological process,response to stimulus,transport	catalytic activity,enzyme regulator activity,protein binding		215		0.07			0.14815	0	6	0	6	0	3.4		GYTQQLAFR,GVFVLNK,ILLQGTPVAQMTEDAVDAER,WLNEQR,NTLIIYLDK,LPYSVVR
B4DTY8	ITGA1	cDNA FLJ61587, highly similar to Integrin alpha-1		1	1	cell surface,membrane	cell organization and biogenesis,cellular component movement,regulation of biological process,response to stimulus	metal ion binding,protein binding		82		0.08			0.14207	0	3	0	3	0	1.8		ELAIQISK,ASQIIIPR,FVEEIK
B2R950	PZP	cDNA, FLJ94213, highly similar to Homo sapiens pregnancy-zone protein (PZP), mRNA		1	1	extracellular	regulation of biological process	enzyme regulator activity		109		0.06			0.13921	0	3	0	3	0	2.2		ATVLNYLPK,MVSGFIPLKPTVK,DLFHCVSFTLPR
A0A0A0MQU1		Inverted formin-2		1	1		cell organization and biogenesis	protein binding		47		0.08			0.13646	0	2	0	2	0	2.2		KQQLAEEEAR,LLETER
A0A024R462	FN1	fibronectin 1, isoform CRA_n		1	1	extracellular,membrane,organelle lumen	cell differentiation,cell organization and biogenesis,cellular component movement,defense response,metabolic process,regulation of biological process,response to stimulus,transport	enzyme regulator activity,protein binding		153		0.04			0.13487	0	5	0	5	0	2.5		SEPLIGR,LGVRPSQGGEAPR,STTPDITGYR,VDVIPVNLPGEHGQR,SYTITGLQPGTDYK
Q6P2Q9	PRPF8	Pre-mRNA-processing-splicing factor 8		1	1	membrane,nucleus,spliceosomal complex	cell organization and biogenesis,metabolic process,response to stimulus	RNA binding,catalytic activity,protein binding		183		0.05			0.13309	0	7	0	7	0	2.5		FNTGPVGK,SLPVEEQPK,LLILALER,EQSQLTATQTR,FGDLILK,QQIAEIEK,SGLNQIPNR
H0Y858		Uncharacterized protein		1	1	membrane	cell organization and biogenesis,defense response,regulation of biological process,response to stimulus	protein binding,receptor activity,signal transducer activity		130		0.07			0.12884	0	3	0	3	0	4.3		ETIELVHTEPTDVAQLPSR,HQTLQGLAFPLQPEAQR,LLDSVEQDFHLEIAK
O76031	CLPX	ATP-dependent Clp protease ATP-binding subunit clpX-like, mitochondrial	1	1	2	cytosol,membrane,mitochondrion,organelle lumen	metabolic process,regulation of biological process	catalytic activity,enzyme regulator activity,metal ion binding,nucleotide binding,protein binding	40	82	0.05	0.1	2	0.062468	0.12884	1	2	1	2	1.7	3.6	IGSVPGIHQLR	TLVQILTEPR,SNILLLGPTGSGK
G3V180	DPP3	dipeptidyl peptidase 3		1	1	cytoplasm,cytosol,membrane	metabolic process	catalytic activity,metal ion binding,protein binding		80		0.04			0.12884	0	2	0	2	0	3		LLSPTER,VILGSEAAQQHPEEVR
Q03252	LMNB2	Lamin-B2		1	1	membrane,nucleus		catalytic activity,motor activity,structural molecule activity		48		0.05			0.12884	0	2	0	2	0	2.9		LLEGEEER,ISEKEEVTTR
A4FU77	SNRNP200	SNRNP200 protein		1	1	membrane,nucleus,spliceosomal complex	cell differentiation,cell organization and biogenesis,metabolic process	DNA binding,RNA binding,catalytic activity,nucleotide binding,protein binding		144		0.08			0.12741	0	5	0	5	0	2.3		DIDAFWLQR,TGNFQVTELGR,HLILPEK,GTQVYSPEK,DTLGLFLR
B2RBY8	ENPP1	cDNA, FLJ95771, highly similar to Homo sapiens ectonucleotide pyrophosphatase/phosphodiesterase 1 (ENPP1), mRNA		1	1	cell surface,membrane	cellular homeostasis,metabolic process,regulation of biological process,response to stimulus,transport	catalytic activity,metal ion binding,nucleotide binding,protein binding,receptor activity		46		0.07			0.12534	0	2	0	2	0	1.9		VIYGPAAR,KEPVSDILK
Q06124-2	PTPN11	Isoform 2 of Tyrosine-protein phosphatase non-receptor type 11		1	1	cytoplasm,cytosol,mitochondrion,nucleus	cell differentiation,cell organization and biogenesis,cellular component movement,metabolic process,regulation of biological process,response to stimulus	catalytic activity,protein binding		48		0.05			0.12202	0	2	0	2	0	3		ESAAHDYTLR,YDVGGGER
P10745	RBP3	Retinol-binding protein 3		1	1	extracellular	metabolic process,transport	catalytic activity		52		0.02			0.12202	0	2	0	2	0	1.1		LAQGAYR,LSGLQSR
Q14204	DYNC1H1	Cytoplasmic dynein 1 heavy chain 1	1	1	2	cytoplasm,cytoskeleton,cytosol,extracellular,membrane,organelle lumen	cell organization and biogenesis,cellular component movement,transport	RNA binding,catalytic activity,motor activity,nucleotide binding,protein binding	277	512	0.04	0.08	2	0.062956	0.12006	8	14	7	13	1.3	2.5	TMTLFSALR,YATLATVSR,EFGPVVIDYGK,VPVNLLR,EYQTQLIQR,DLFQVAFNR,IFTIESTR	YATLATVSR,SNSLAFIK,EFGPVVIDYGK,EVDGLDVSK,TEYLSNADER,INEWLTLVEK,ALGEYLER,IFTIESTR,KIIDSVR,EYQTQLIQR,QNLDALLNQLK,VDNEFDQR,DLFQVAFNR
P01833	PIGR	Polymeric immunoglobulin receptor		1	1	extracellular,membrane	cell organization and biogenesis,regulation of biological process,response to stimulus,transport	protein binding,receptor activity,signal transducer activity		67		0.08			0.11887	0	2	0	2	0	3.5		NADLQVLKPEPELVYEDLR,VYTVDLGR
E5RHK8		Dynamin-3	1	1	2			catalytic activity,nucleotide binding	43	43			#DIV/0!	0.11304	0.11304	2	2	2	2	2.9	2.9	KYMLPLDNLKVR,KLANFPR	KYMLPLDNLKVR,KLANFPR
B2R7F8	PLG	Plasminogen		1	1	cell surface,extracellular,membrane,organelle lumen	cell organization and biogenesis,coagulation,metabolic process,regulation of biological process,transport	catalytic activity,protein binding		50		0.04			0.11304	0	2	0	2	0	1.8		TPENFPCK,YEFLNGR
Q308M6	POLD1	DNA polymerase		1	1	cytosol,membrane,nucleus	cell organization and biogenesis,metabolic process,response to stimulus	DNA binding,catalytic activity,metal ion binding,nucleotide binding,protein binding		114		0.03			0.11213	0	4	0	4	0	2.9		LLEQGIR,QVLDGRQLGLK,VVSQLLR,ELNLAISR
Q6URC4	DIAPH1	diaphanous 1		1	1	cytoplasm,cytosol,membrane	cell organization and biogenesis,regulation of biological process,response to stimulus,transport	RNA binding,catalytic activity,motor activity,protein binding		123		0.07			0.11213	0	4	0	3	0	2		LMADELER,ELGEYFLFDPK,LNAILFK
B2RDX5	TARS	cDNA, FLJ96812, highly similar to Homo sapiens threonyl-tRNA synthetase (TARS), mRNA		1	1	cytoplasm,cytoskeleton,cytosol	metabolic process	catalytic activity,nucleotide binding,protein binding		80		0.04			0.11034	0	2	0	2	0	2.8		NELSGALTGLTR,AILGSVER
B4DSD8	PYGB	alpha-1,4 glucan phosphorylase		1	1	cytoplasm,extracellular,membrane,organelle lumen	metabolic process,transport	catalytic activity,protein binding		77		0.08			0.11034	0	2	0	2	0	2.6		LLPLVSDEVFIR,VIFLENYR
H0YHE2		Intraflagellar transport protein 81 homolog		1	1		cell organization and biogenesis,cellular component movement,regulation of biological process,transport	protein binding		44		0.04			0.11034	0	2	0	2	0	2.5		EEYLAQQK,WDFTMLAR
Q13905-2	RAPGEF1	Isoform Short of Rap guanine nucleotide exchange factor 1		1	1		regulation of biological process,response to stimulus			45					0.11034	0	2	0	2	0	2.1		EVVSALRYFK,RWQQFNILDSMR
Q92896-2	GLG1	Isoform 2 of Golgi apparatus protein 1		1	1	Golgi,membrane	cellular component movement,regulation of biological process	protein binding		77		0.02			0.1086	0	3	0	3	0	1.8		KEVLNMLK,LIAQDYK,NDINILK
O95171-3	SCEL	Isoform 3 of Sciellin		1	1	cytoplasm,cytoskeleton	cell differentiation	metal ion binding,protein binding		46		0.04			0.10776	0	2	0	2	0	2.3		VATSLQR,MSNVTLRK
B3KTJ9	KIAA1967,CCAR2	cDNA FLJ38393 fis, clone FEBRA2007212		1	1	cytoplasm,nucleus,organelle lumen,spliceosomal complex	cell organization and biogenesis,metabolic process,regulation of biological process,response to stimulus	RNA binding,enzyme regulator activity,protein binding		57		0.06			0.1053	0	2	0	2	0	2.1		LAEAEETAR,VQTLSNQPLLK
Q04721	NOTCH2	Neurogenic locus notch homolog protein 2		1	1	cell surface,cytoplasm,extracellular,membrane,nucleus	cell death,cell differentiation,cell growth,development,metabolic process,regulation of biological process,response to stimulus	metal ion binding,protein binding,receptor activity,signal transducer activity		154		0.04			0.10372	0	3	0	3	0	1.4		NCQTLVNLCSR,ALGTLLHTNLR,GLLCEENIDDCAR
A0A024RB84	ERBB3	v-erb-b2 erythroblastic leukemia viral oncogene homolog 3 (avian), isoform CRA_a		1	1	membrane	cell death,cell differentiation,metabolic process,regulation of biological process,response to stimulus	catalytic activity,enzyme regulator activity,nucleotide binding,protein binding,receptor activity,signal transducer activity		46					0.10069	0	2	0	2	0	1.7		VLGSGVFGTVHK,GESIEPLDPSEK
Q13813-2	SPTAN1	Isoform 2 of Spectrin alpha chain, non-erythrocytic 1		1	1	cytoskeleton,cytosol,extracellular,membrane,organelle lumen	cell organization and biogenesis,cellular component movement,metabolic process,regulation of biological process,response to stimulus,transport	metal ion binding,protein binding,structural molecule activity		226		0.05			0.098241	0	7	0	7	0	2.8		DLTGVQNLR,DLASVQALLR,VLETAEDIQER,EAGSVSLR,VNSLGETAER,SQLLGSAHEVQR,GLVSSDELAK
B4DKD0	TOP2B	DNA topoisomerase 2		1	1	cytosol,nucleus	cell organization and biogenesis,cellular component movement,metabolic process,regulation of biological process	DNA binding,catalytic activity,metal ion binding,nucleotide binding,protein binding		101		0.07			0.09515	0	3	0	3	0	2.5		ELILFSNSDNER,YGVFPLR,NTVEITELPVR
D3DUW5	DNM1L	dynamin 1-like, isoform CRA_c		1	1	Golgi,cytoplasm,cytosol,endoplasmic reticulum,membrane,mitochondrion	cell death,cell organization and biogenesis,regulation of biological process,transport	catalytic activity,enzyme regulator activity,nucleotide binding,protein binding		41					0.0945	0	2	0	2	0	2		SVTDSIR,SQLDINNKK
O75694	NUP155	nuclear pore complex protein nup155		1	1	membrane,nucleus	cell organization and biogenesis,metabolic process,regulation of biological process,transport	protein binding,structural molecule activity,transporter activity		51		0.02			0.089023	0	2	0	2	0	1.4		LLEVYDQLFK,AAPQSPSVPK
Q92859-2	NEO1	Isoform 2 of Neogenin		1	1			protein binding		104		0.04			0.087336	0	2	0	2	0	1.2		QPLLLDDR,DVVASLVSTR
I0B0K7	FLG	Truncated profilaggrin		1	1	cytosol,nucleus	cell death,cell differentiation,development	metal ion binding,protein binding,structural molecule activity		181		0.05			0.083384	0	4	0	4	0	2.4		QSESSHGWTGPSTGVR,HSASQDGQDTIR,LAQAYYESTR,HTQTSSGGQAASSHEQAR
B4DEP6	EIF4B	cDNA FLJ59206, highly similar to Eukaryotic translation initiation factor 4B		1	1	cytosol	cell organization and biogenesis,metabolic process,regulation of biological process	RNA binding,catalytic activity,nucleotide binding,protein binding		59		0.05			0.082637	0	2	0	2	0	2.5		LQKEQEK,GLNISAVR
B4DIX0	FLII	cDNA FLJ50778, highly similar to Protein flightless-1 homolog	1	1	2	cytosol	cell organization and biogenesis,development,metabolic process,regulation of biological process	protein binding	49	53	0.02	0.05	2.5	0.039798	0.081181	1	2	1	2	0.8	2	ADLTALFLPR	NAEAVLQSPGLSGK,SLEGTEAQVFK
Q9HAU5	UPF2	Regulator of nonsense transcripts 2		1	1	cytoplasm,cytosol,nucleus	metabolic process,transport	DNA binding,RNA binding,protein binding		55		0.02			0.079775	0	2	0	2	0	1.2		QQPFQNLLK,ALFIVPR
Q9UIW2	PLXNA1	Plexin-A1		1	1	membrane	cell growth,cellular component movement,development,regulation of biological process,response to stimulus	protein binding,receptor activity,signal transducer activity		83		0.05			0.078865	0	3	0	3	0	1.5		APSVANPVR,MVSEIYLTR,GPIDAITGEAR
A0A024R9Q1	THBS1	thrombospondin 1, isoform CRA_a		1	1	cell surface,endoplasmic reticulum,extracellular,organelle lumen	cell organization and biogenesis,cellular component movement,defense response,metabolic process,regulation of biological process,response to stimulus,transport	metal ion binding,protein binding		83		0.05			0.077105	0	2	0	2	0	1.9		FVFGTTPEDILR,TIVTTLQDSIR
K4DI93	CUL4B	Cullin 4B, isoform CRA_e		1	1	cytosol	cell organization and biogenesis,metabolic process,regulation of biological process,response to stimulus	DNA binding,catalytic activity,protein binding		72		0.06			0.075836	0	2	0	2	0	1.5		SIFLFLDR,LQEIFK
Q2NL82	TSR1	Pre-rRNA-processing protein TSR1 homolog		1	1	cytosol,nucleus	cell organization and biogenesis,metabolic process	RNA binding,catalytic activity,nucleotide binding		45		0.04			0.074608	0	2	0	2	0	2.8		VDEEAEAKMLEKYK,SIFKEVEEK
Q8TEM1	NUP210	Nuclear pore membrane glycoprotein 210		1	1	endoplasmic reticulum,membrane,nucleus	cell organization and biogenesis,metabolic process,regulation of biological process,transport	protein binding		70		0.02			0.069019	0	2	0	2	0	0.7		IQEAVYK,VIVAVGDR
B2RUT8	TSPOAP1,BZRAP1	Benzodiazapine receptor (peripheral) associated protein 1		1	1	Golgi,cytoplasm,cytosol,mitochondrion	cell organization and biogenesis,cellular component movement,metabolic process,regulation of biological process,reproduction,response to stimulus,transport	catalytic activity,motor activity,protein binding,structural molecule activity		49		0.02			0.06605	0	2	0	2	0	0.8		QQLLQR,GQLLGVTQER
A0A087X0T3		Myosin-7B		1	1		metabolic process	catalytic activity,motor activity,nucleotide binding,protein binding		120		0.01			0.063618	0	4	0	4	0	1.6		KLEGDLK,QATEAQAATR,VEELQR,CNGVLEGIR
V9HWC1	MYH1	Epididymis luminal protein 71	1	1	2		metabolic process,regulation of biological process	catalytic activity,motor activity,nucleotide binding,protein binding,structural molecule activity	119	119		0.01	#DIV/0!	0.081902	0.060818	5	5	5	4	1.8	1.5	KLEGDLK,NLEQTVK,NTQAILK,QQLDEKLK,LQDLVDK	KLEGDLK,NTQAILK,CNGVLEGIR,LQDLVDK
Q9UHN6	TMEM2	Transmembrane protein 2		1	1	membrane	development	protein binding		71		0.04			0.060026	0	3	0	2	0	1.3		IVAIAVGDSAAK,NNISLVK
A4D0S4	LAMB4	Laminin subunit beta-4		1	1	Golgi,extracellular	cellular component movement,regulation of biological process,transport	catalytic activity,motor activity,protein binding		54					0.060026	0	2	0	2	0	1		QIMQLNEQLK,KIQDLNLSR
Q9Y4D7	PLXND1	plexin-D1		1	1	membrane	cell organization and biogenesis,cellular component movement,development,regulation of biological process,response to stimulus	protein binding,receptor activity,signal transducer activity		75		0.03			0.059254	0	2	0	2	0	0.9		TNSLPLR,INLNESMQVVSR
Q5JPF3	ANKRD36C	Ankyrin repeat domain-containing protein 36C		1	1			protein binding		63					0.050211	0	3	0	3	0	1.6		DIEKMYK,RTISQQSAEK,QLQQKQDDVLNKR
A0A087WZL3	ALK	Tyrosine-protein kinase receptor	1	1	2	membrane	metabolic process,regulation of biological process,response to stimulus	catalytic activity,nucleotide binding,protein binding,receptor activity,signal transducer activity	32	48	0.02		0	0.047129	0.047129	1	2	1	2	0.4	1	MSWLIR	MSWLIR,KNNPIAK
A0A087WUZ3		Spectrin beta chain		1	1	cytoplasm,cytoskeleton	cell organization and biogenesis,regulation of biological process	protein binding,structural molecule activity		103		0.04			0.047129	0	3	0	3	0	0.9		LFQLNR,VQAVVAVAR,LSGIEER
A0A087WUP9		Transmembrane protein 132D		1	1					42					0.045275	0	2	0	2	0	1.5		GTTTDRSILQK,FSLNWK
O75882	ATRN	Attractin		1	1	cytoplasm,extracellular,membrane	defense response,regulation of biological process,response to stimulus	protein binding,receptor activity		49					0.040498	0	2	0	2	0	1.3		REQLLR,SEAACLAAGPGIR
Q9UPN3	MACF1	Microtubule-actin cross-linking factor 1, isoforms 1/2/3/5		1	1	Golgi,cytoplasm,cytoskeleton,membrane	cell organization and biogenesis,regulation of biological process,response to stimulus,transport	RNA binding,catalytic activity,metal ion binding,motor activity,protein binding		179		0			0.031971	0	7	0	7	0	0.7		INQLSAR,LQDELVTLR,QVKLVNIR,RTGTVQVLK,LTVEEAVR,QLIGTQR,EQVSEAIK
Q6ZMW3-2	EML6	Isoform 2 of Echinoderm microtubule-associated protein-like 6	1	1	2			protein binding	75	54		0.02	#DIV/0!	0.045275	0.022387	3	2	3	2	1.2	0.8	LLQVNSGAR,MADRTAPR,IWDLADK	MADRTAPR,IWDLADK
A0A0A0MRF6		A-kinase anchor protein 9		1	1	Golgi	regulation of biological process,response to stimulus	DNA binding,protein binding,structural molecule activity		78		0.01			0.017597	0	3	0	3	0	0.5		KLEQLR,FSLESQK,LQVLPQK
A0A0A0MTC1	RNF213	E3 ubiquitin-protein ligase RNF213		1	1	cytoplasm,cytosol,membrane	cell organization and biogenesis,metabolic process,regulation of biological process	catalytic activity,metal ion binding,protein binding		48					0.017075	0	2	0	2	0	0.3		RCLTLGSLGHK,LLLDEITR
A4D1A8	PCLO	similar to Piccolo protein (Aczonin)		1	1	cytoskeleton,membrane	cell organization and biogenesis,regulation of biological process,response to stimulus,transport	metal ion binding,protein binding		82		0.01			0.014405	0	3	0	3	0	0.6		TDRLLR,QLAAELQK,VDAKVEIIK
A0A0C4DG40	SYNE1	Nesprin-1		1	1	Golgi,cytoplasm,cytoskeleton,membrane,nucleus	cell differentiation,cell organization and biogenesis	RNA binding,protein binding		49					0.0044986	0	2	0	2	0	0.1		LTQIRR,LYQVLDDGKR
Q6PGP7	TTC37	Tetratricopeptide repeat protein 37		1	1	cytoplasm,cytosol,nucleus	metabolic process	protein binding		30		0.02				0	2	0	1	0	0.4		EGKQVLK
